# Supplementary material
Source: publisher figshare collection journal article supplement (https://acs.figshare.com/ndownloader/files/4266439)

## Supporting Information

### Growth mechanism for the controlled synthesis of $\text{MgH}_2/\text{Mg}$ crystals via a vapor-solid process

*Chunyu Zhu*<sup>†</sup> *Sou Hosokai*,<sup>†</sup> *Tomohiro Akiyama*,<sup>\*†</sup>

<sup>†</sup> Center for Advanced Research of Energy Conversion Materials, Hokkaido University, Sapporo 060-8628, Japan

<sup>\*</sup> Corresponding author, Tel.: +81-11-706-6842; Fax: +81-11-726-0731.

Email: [takiyama@eng.hokudai.ac.jp](mailto:takiyama@eng.hokudai.ac.jp)

#### Contents:

- (1) Figure S1: The enlarged image of the mesh (SUS316) used to collect the products.
- (2) Figure S2: The product images, temperature distribution, and SEM images under 1 MPa  $\text{H}_2$ .
- (3) Figure S3: The product images, temperature distribution, and SEM images under 2 MPa  $\text{H}_2$ .
- (4) Figure S4: Mg gas condensation rate and the hydrogenation rate for solidified Mg at 1 and 2 MPa  $\text{H}_2$ , respectively.

**Figure S1**

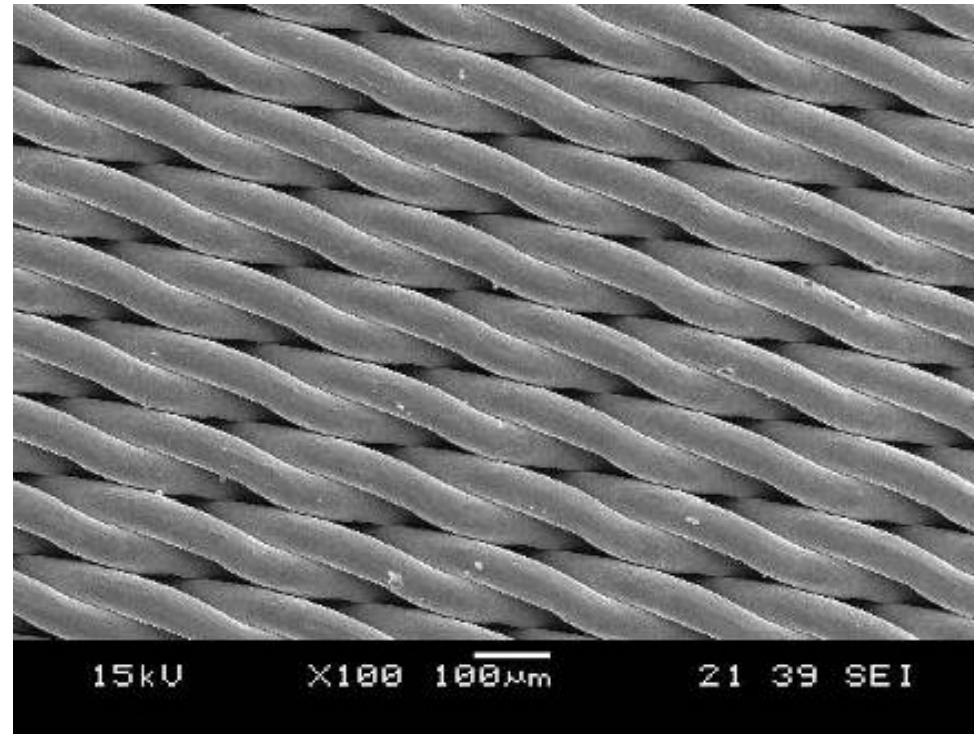

Figure S1. The enlarged image of the mesh (SUS316) used to collect the products in this study.

**Figure S2 – (1). 1 MPa product image**

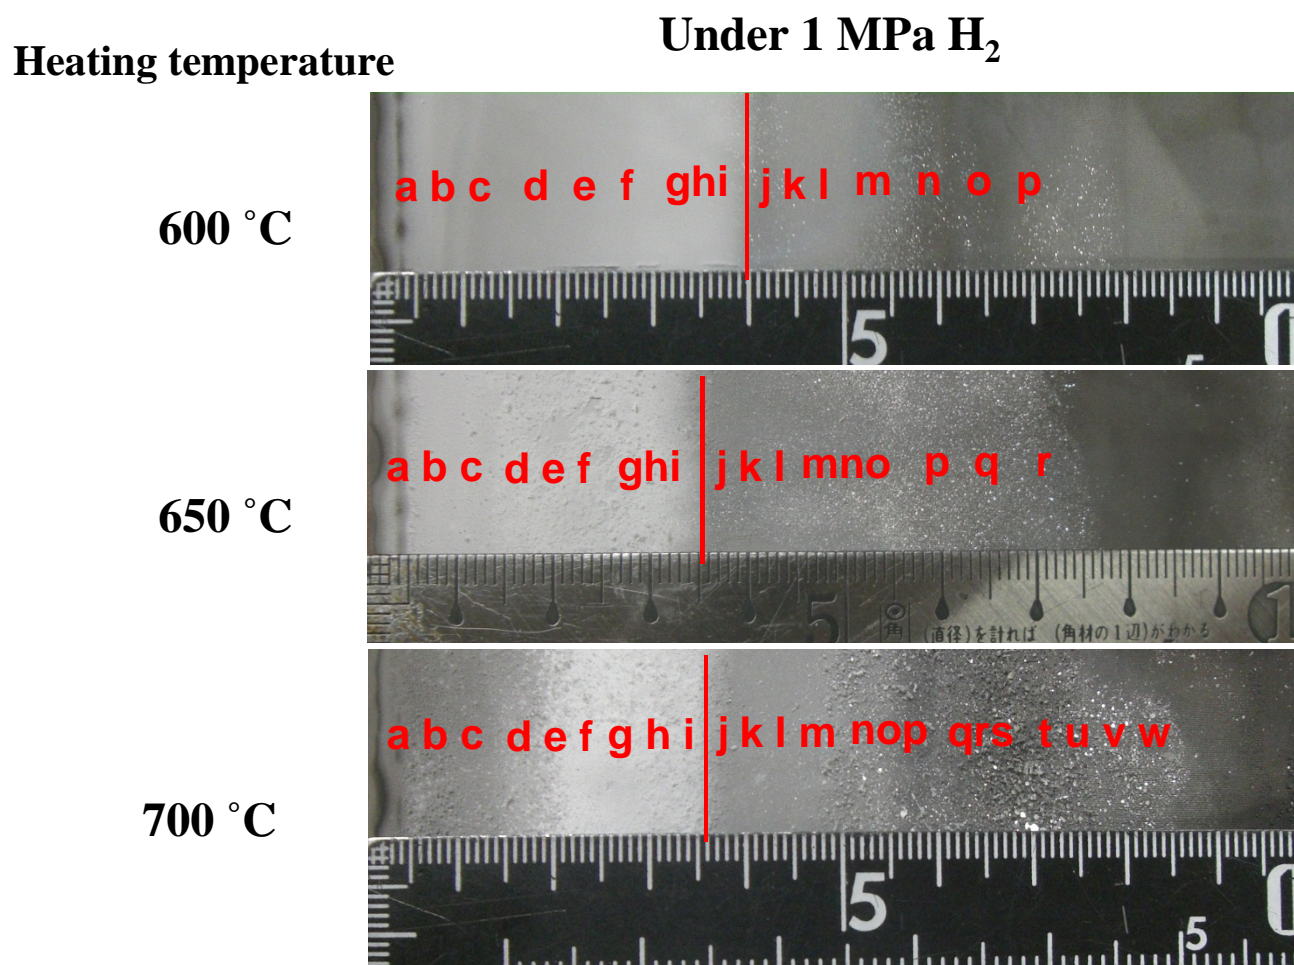

Figure S2 – (1). The images of the product obtained at 1 MPa H<sub>2</sub> with evaporation temperatures of 600, 650, and 700 °C. The abc... numbers are for SEM observation.

**Figure S2 – (2). 1 MPa temperature distribution**

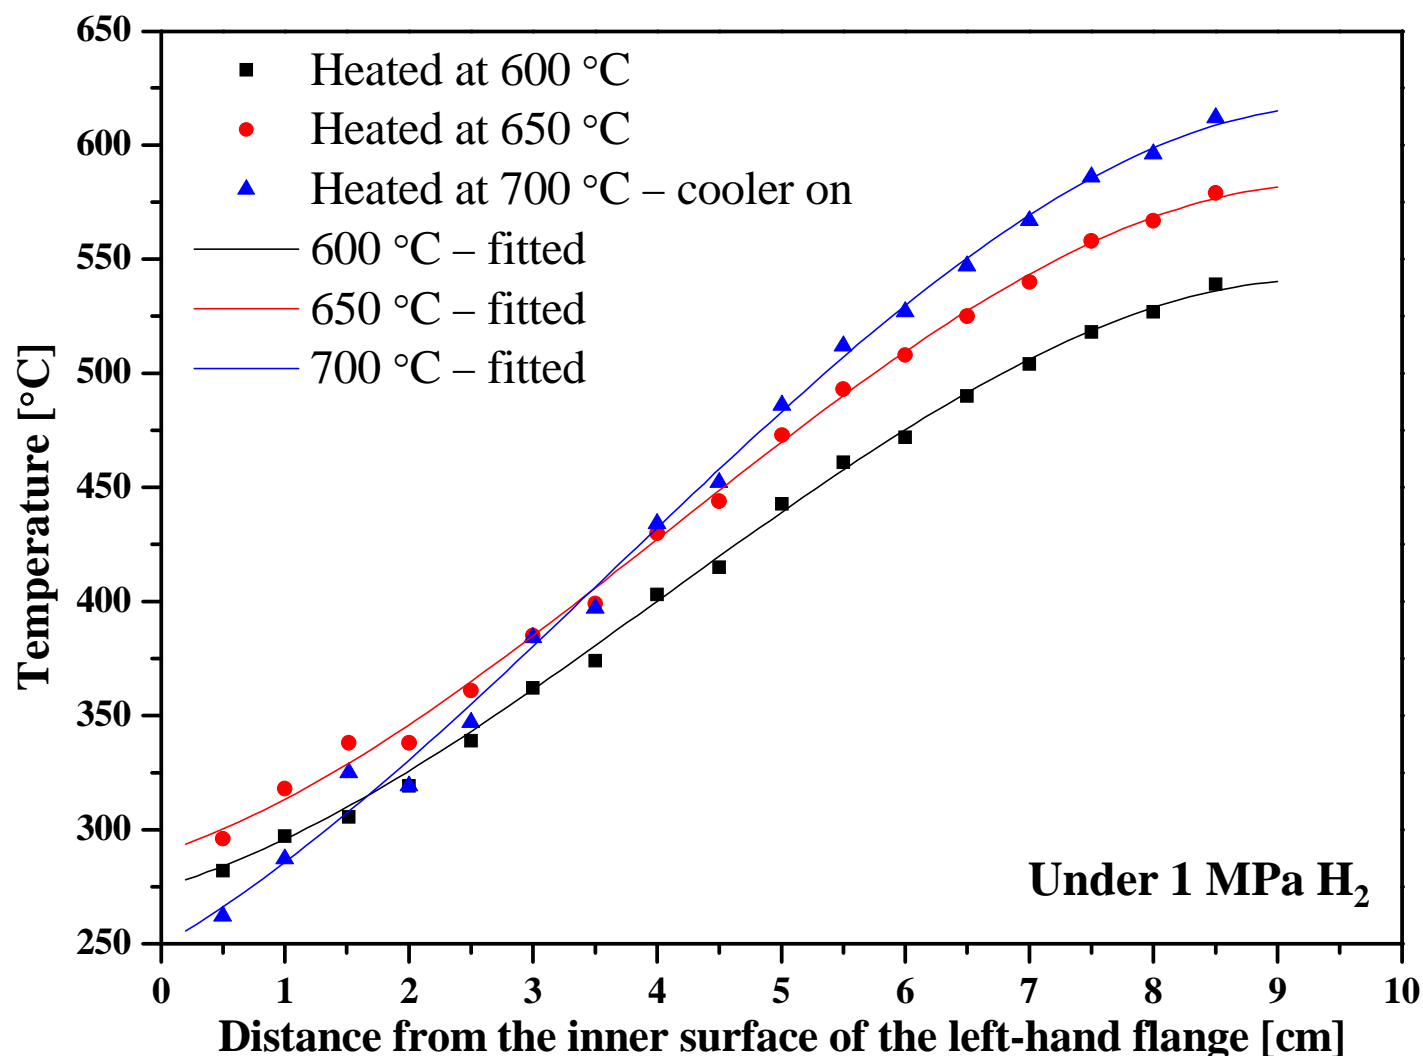

Figure S2 – (2). Temperature distribution on the mesh adhered along the tube wall under 1 MPa H<sub>2</sub> pressure at different evaporation temperatures. To make sure that the lowest deposition temperature is below 300 °C, a cooler jacket was set around the flange with a evaporation temperature of 700 °C.

**Figure S2 – (3). 1 MPa SEM images**

1 MPa-600 °C

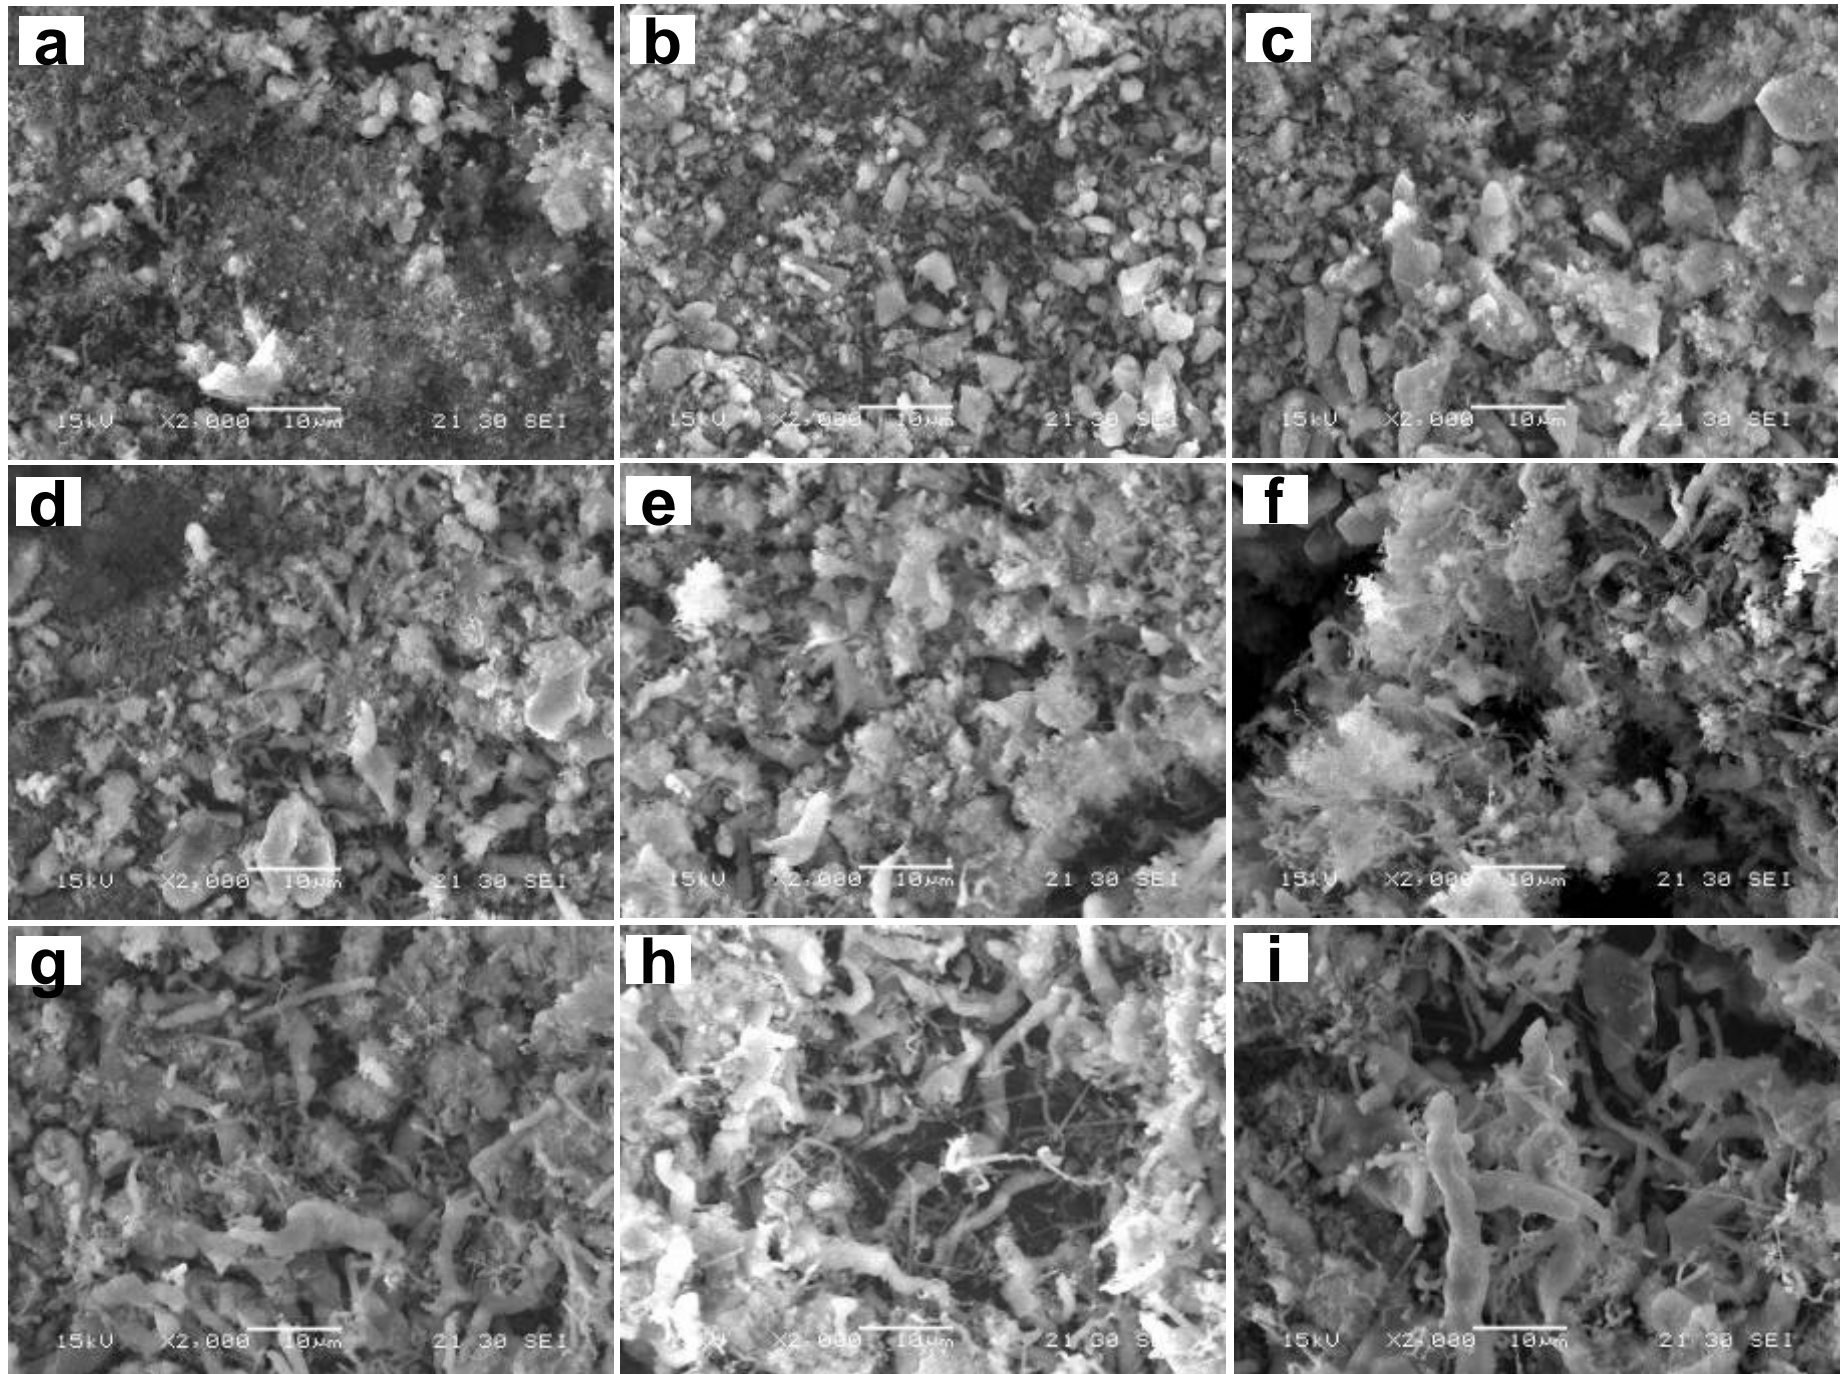

1 MPa-600 °C

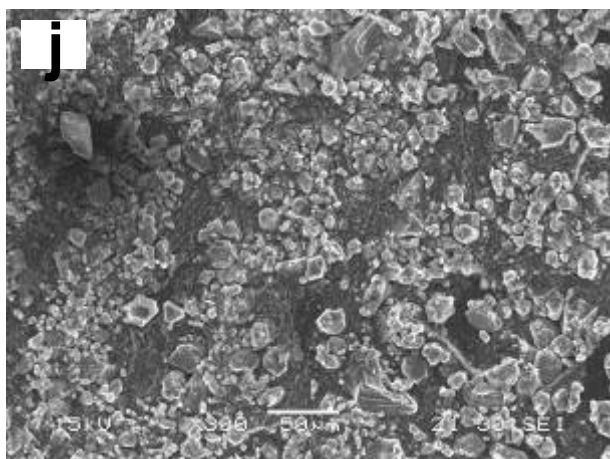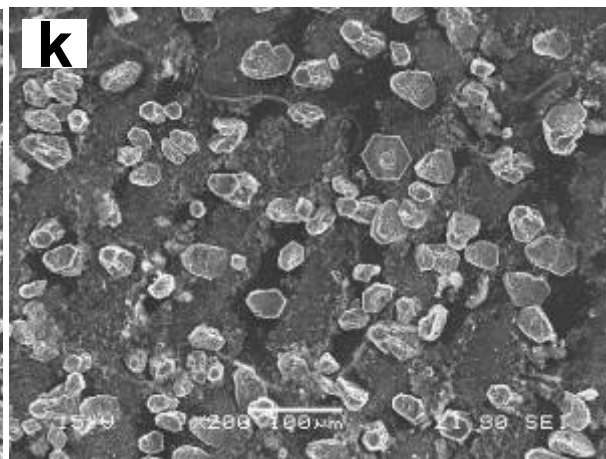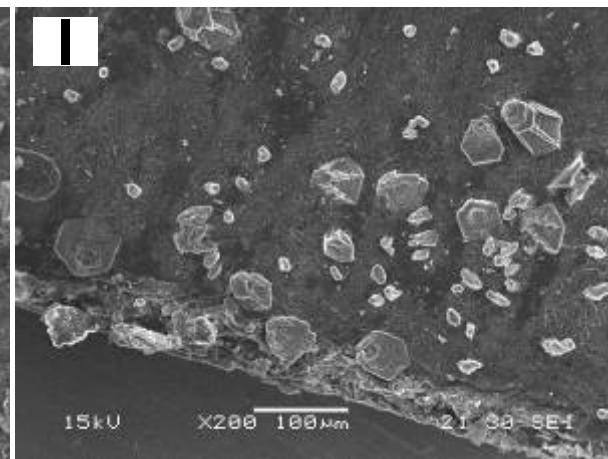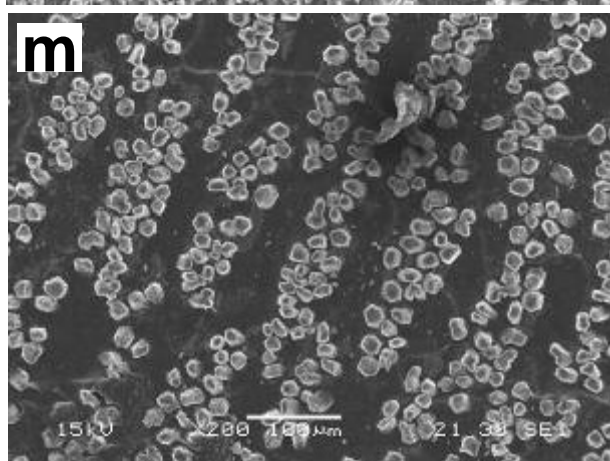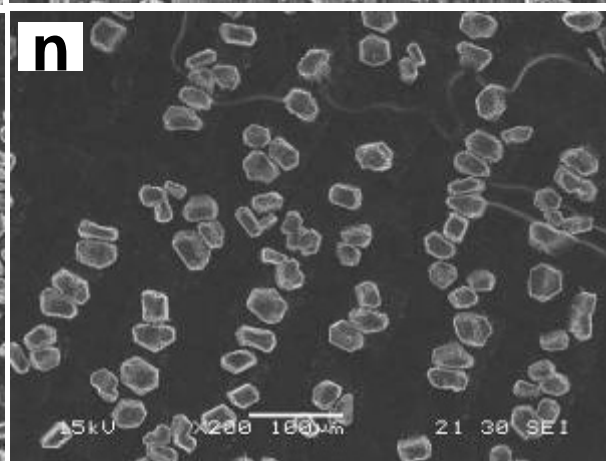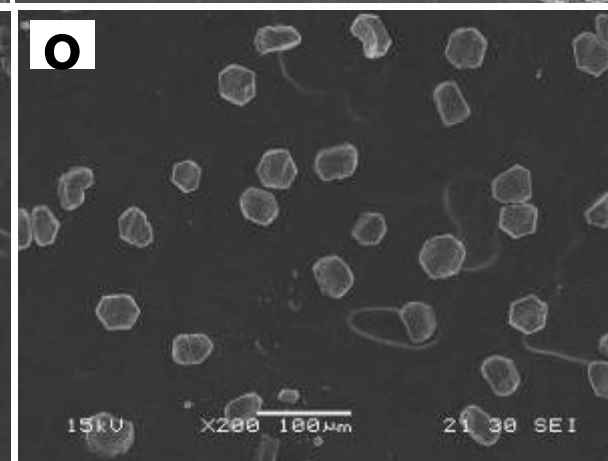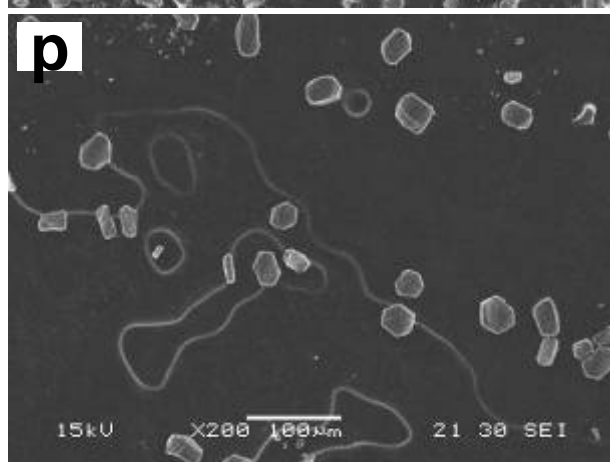

1 MPa-650 °C

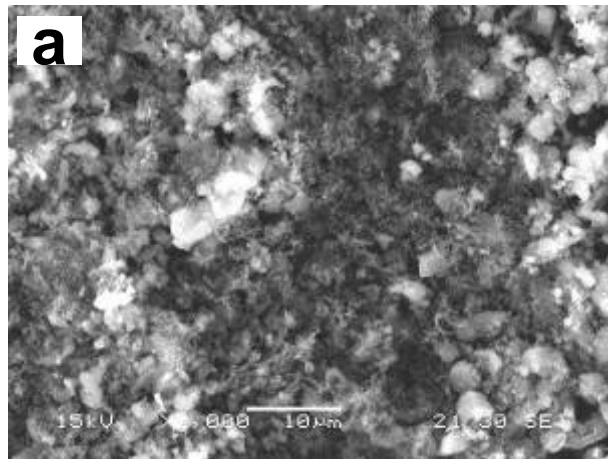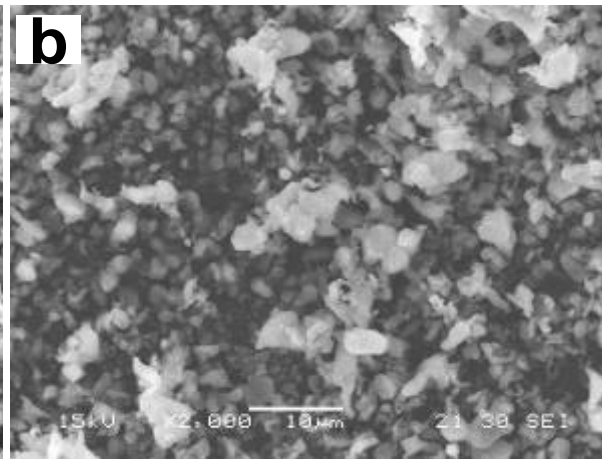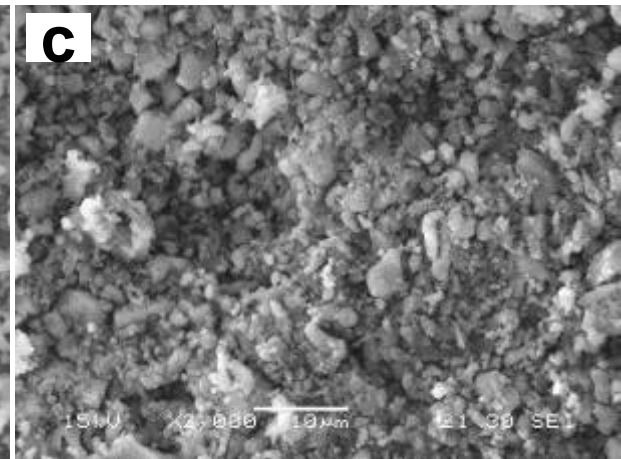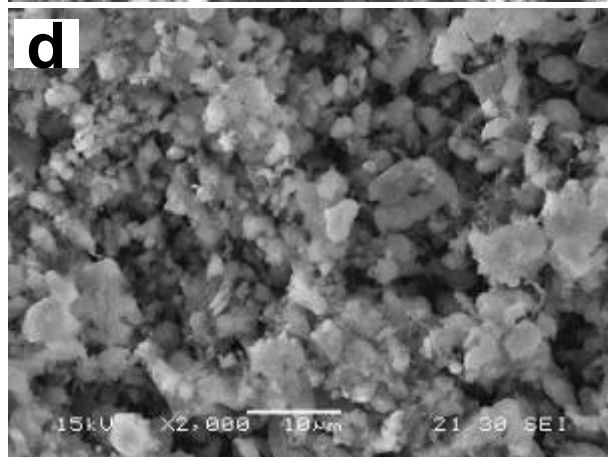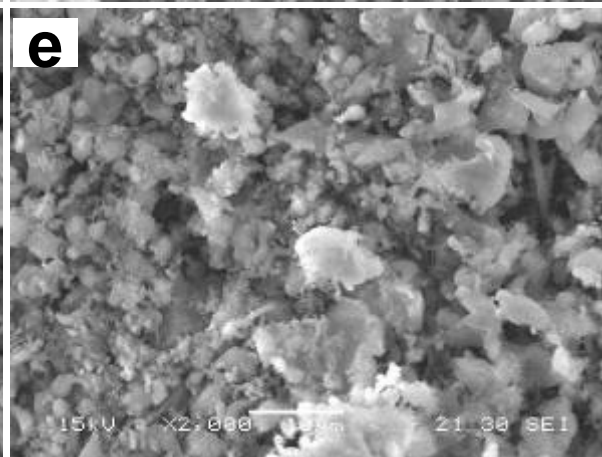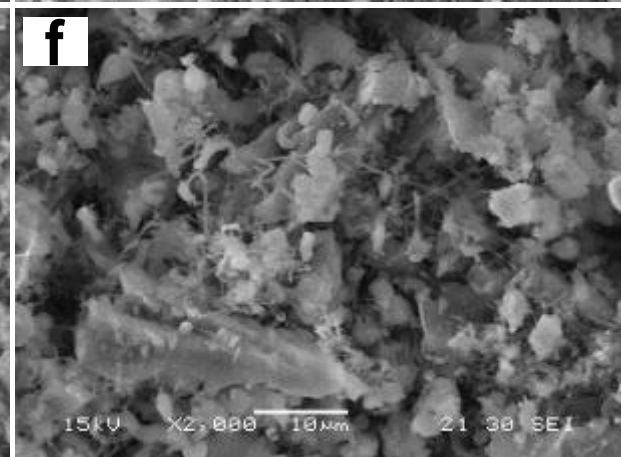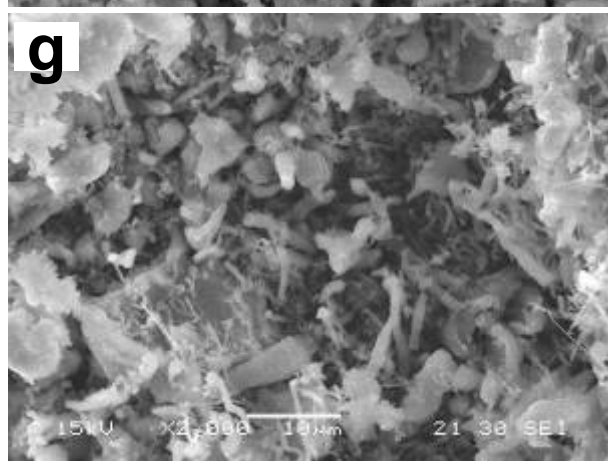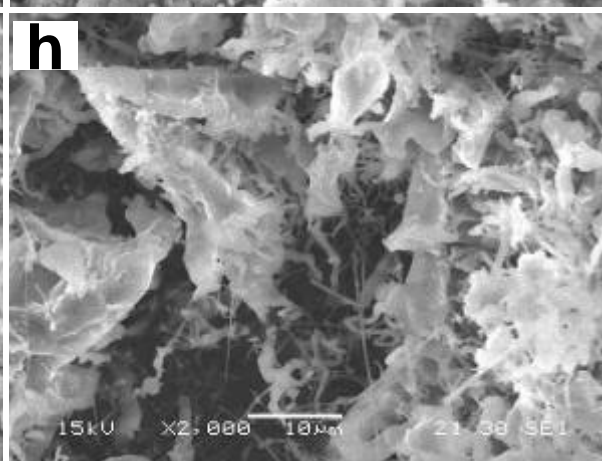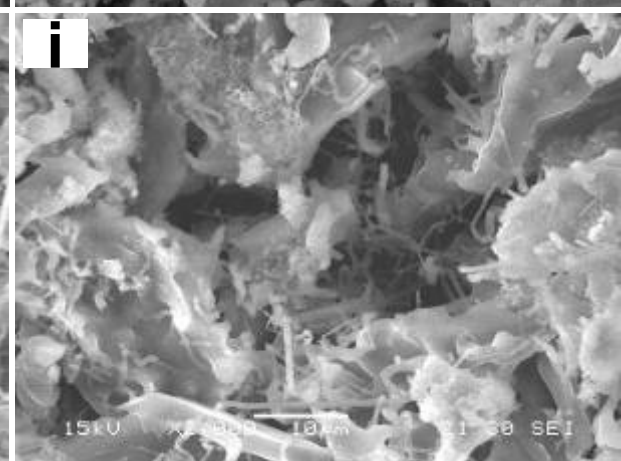

1 MPa-650 °C

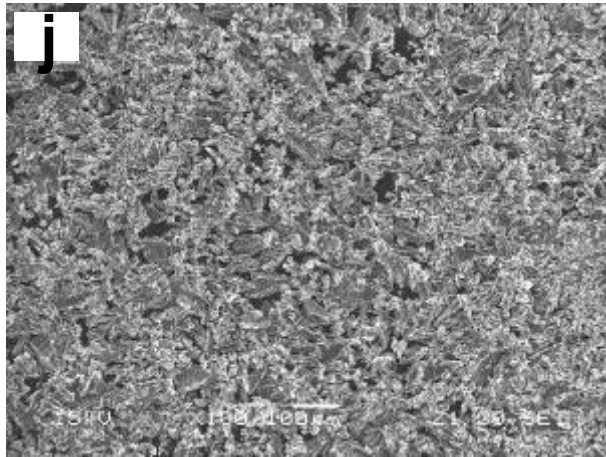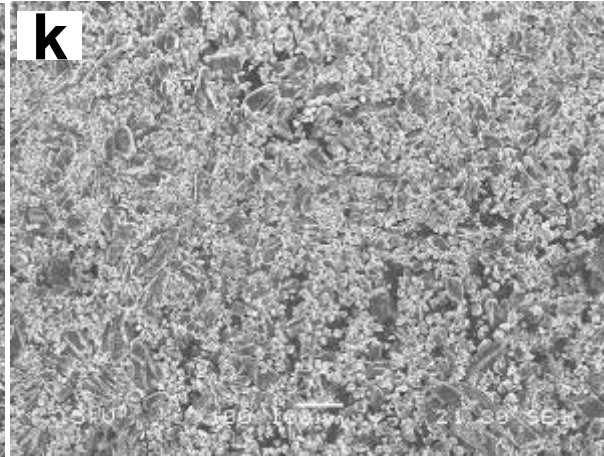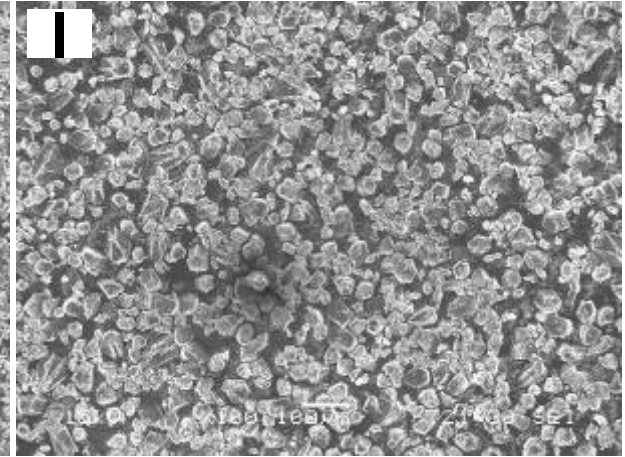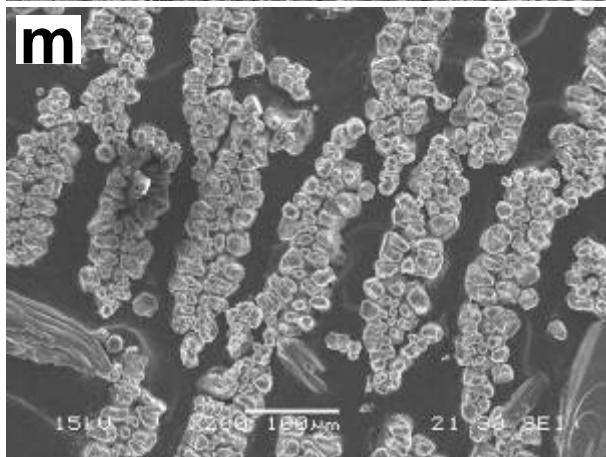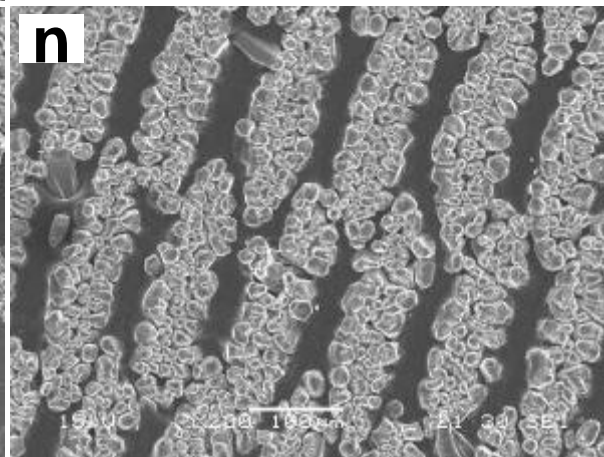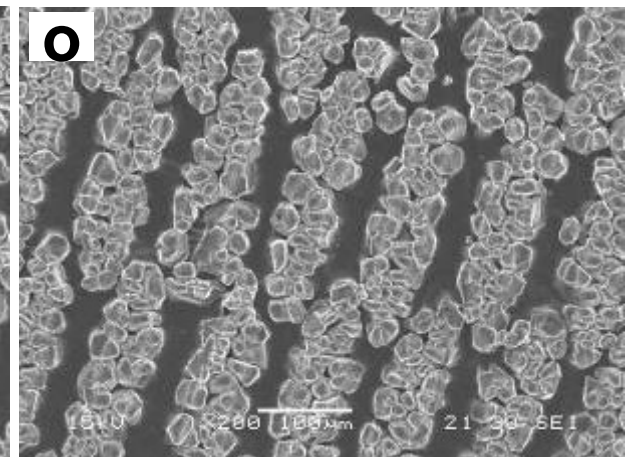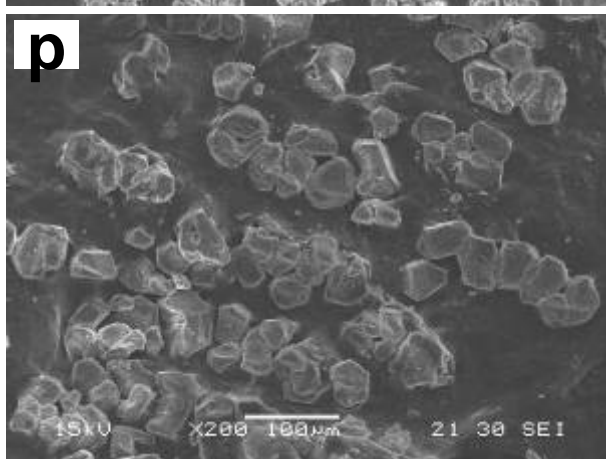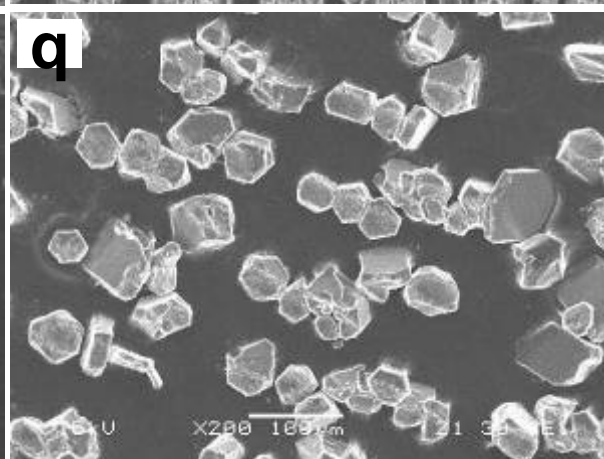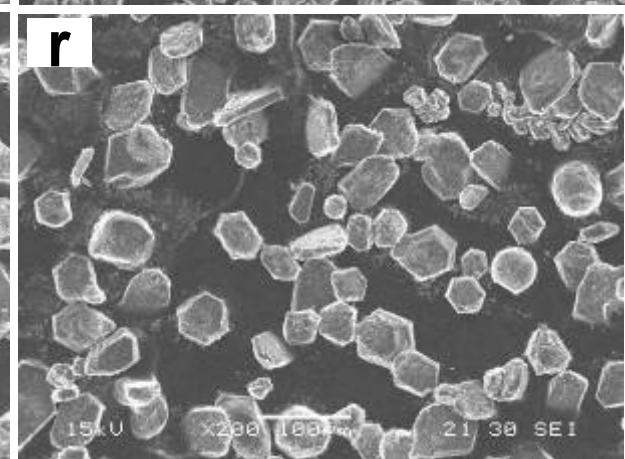

1 MPa-700 °C

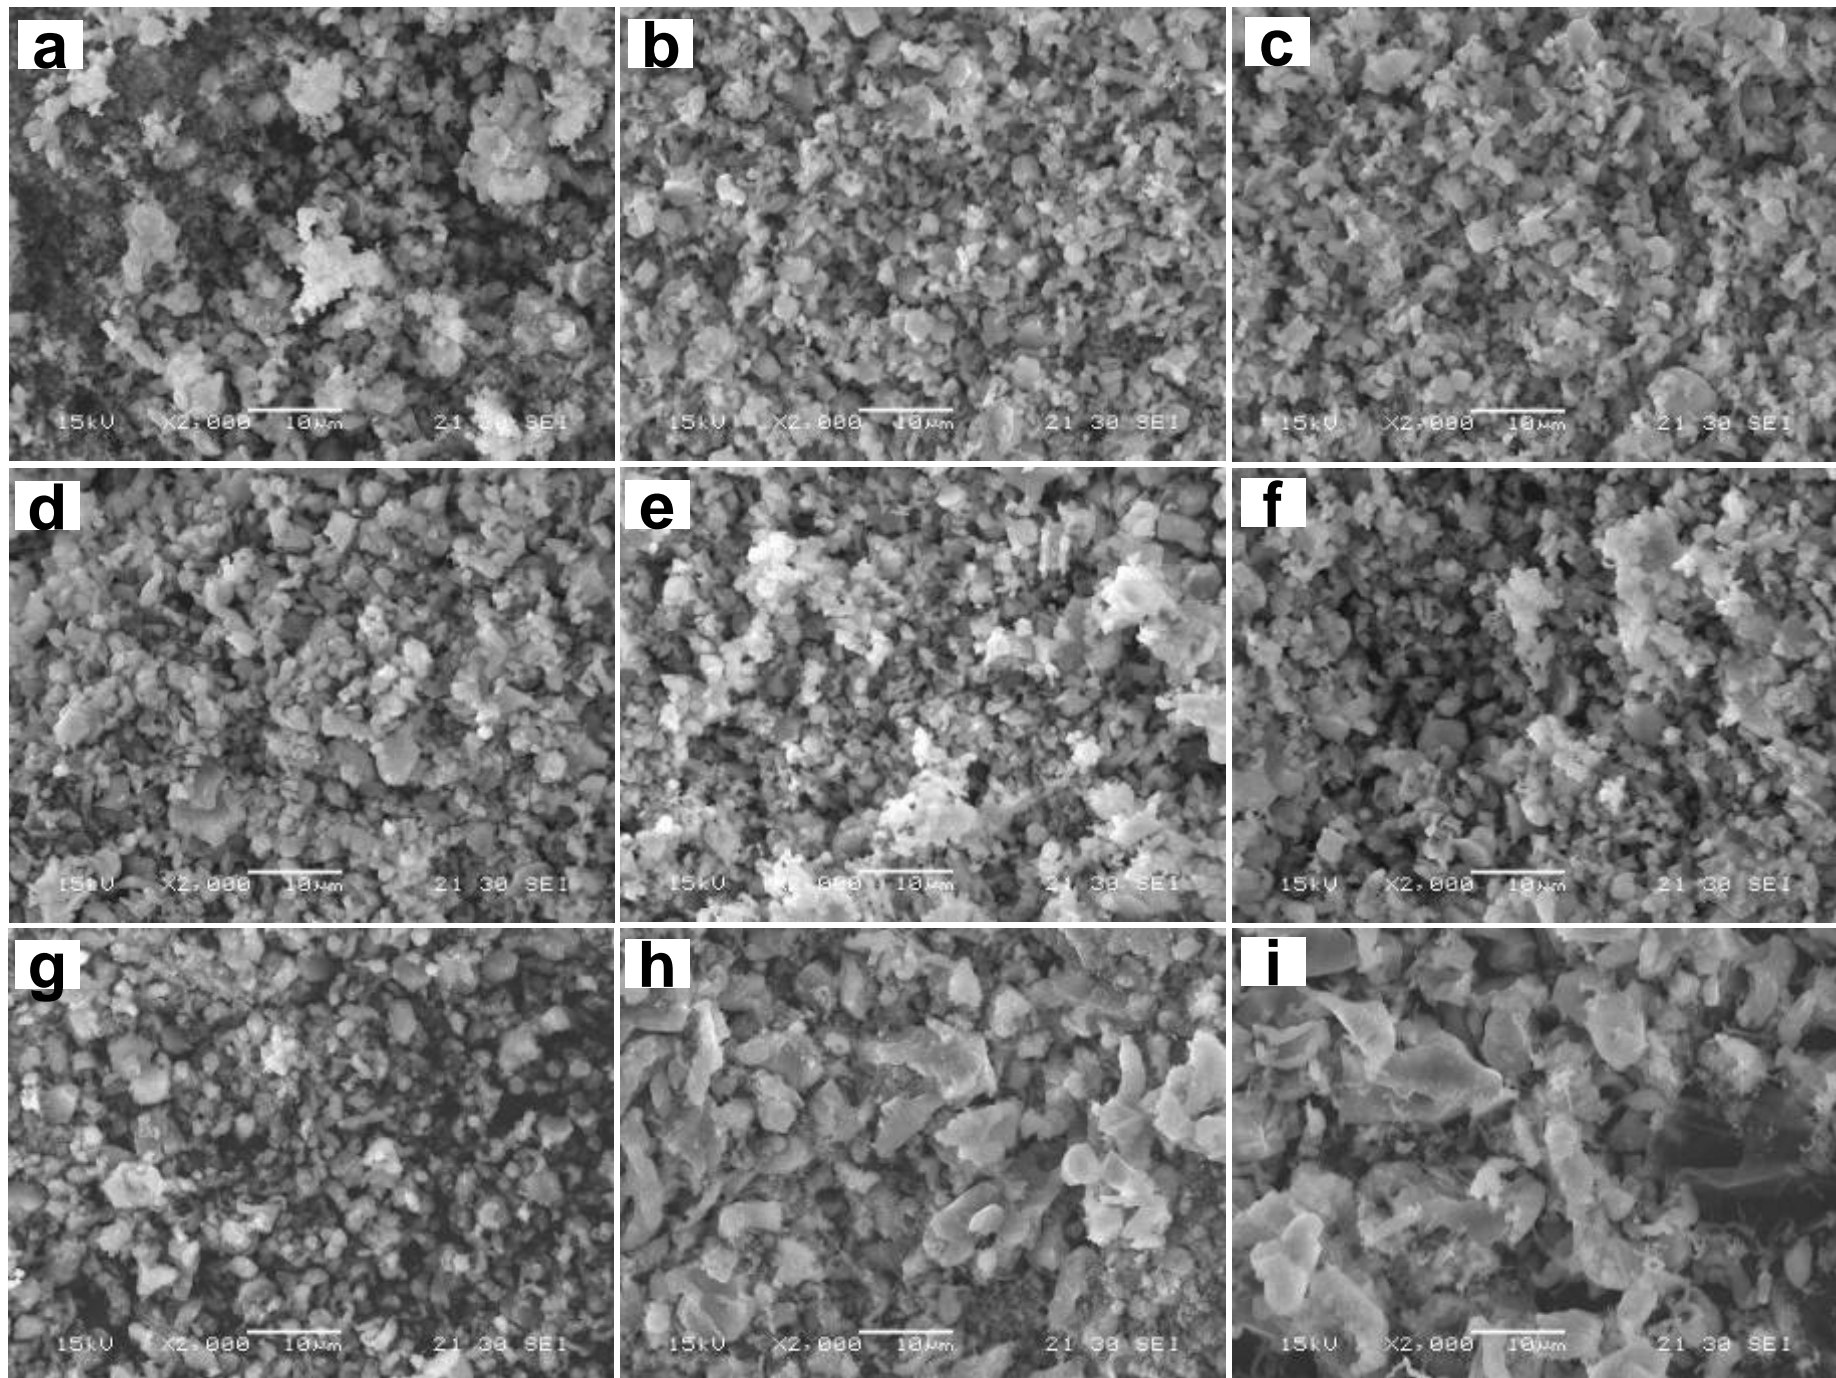

1 MPa-700 °C

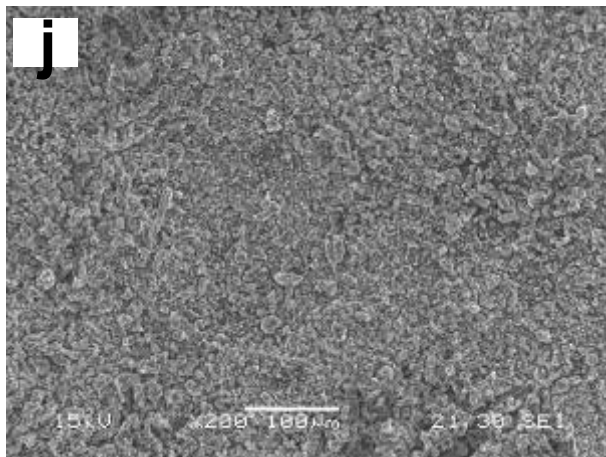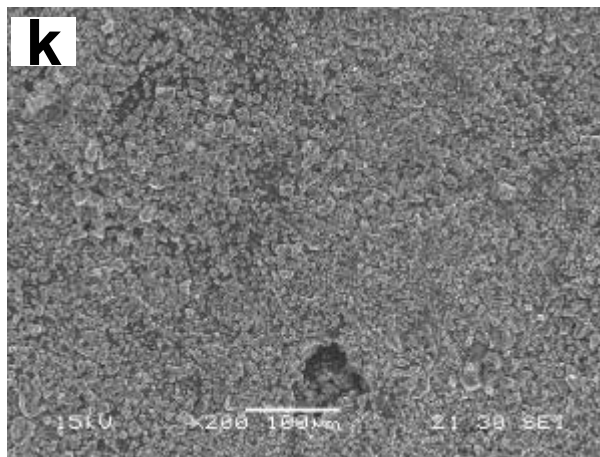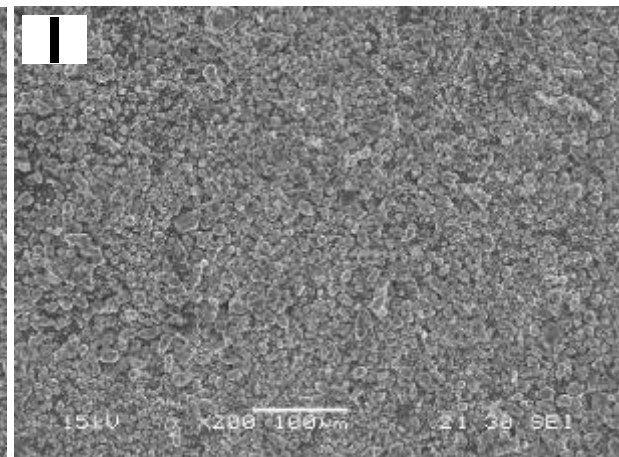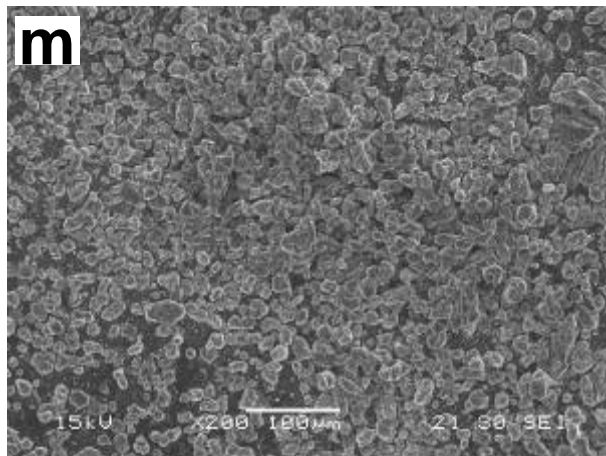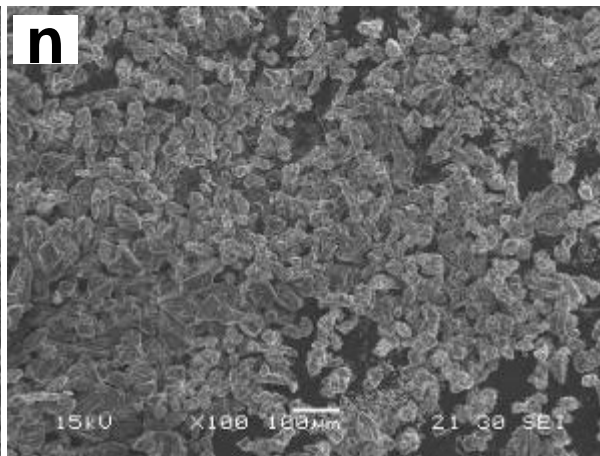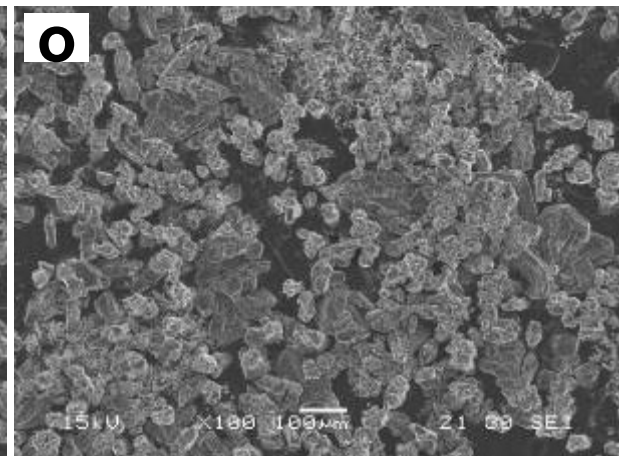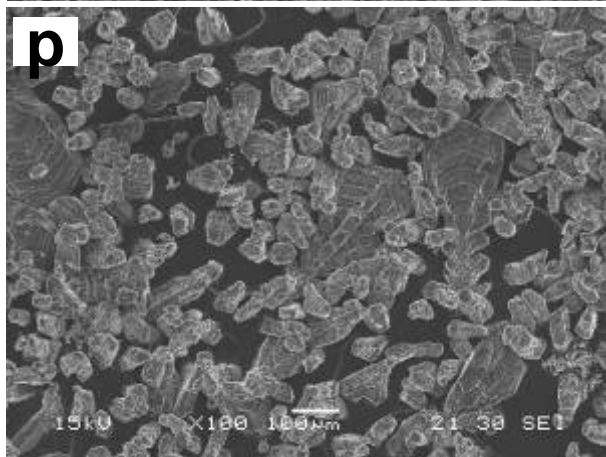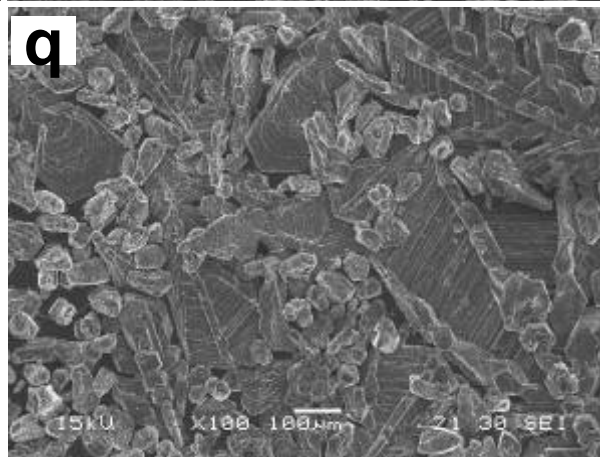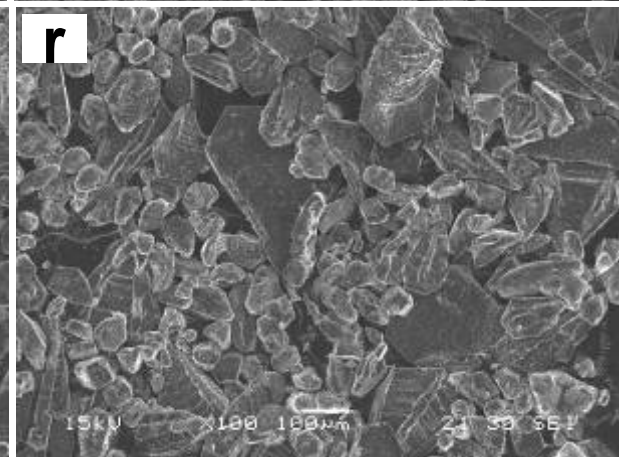

1 MPa-700 °C

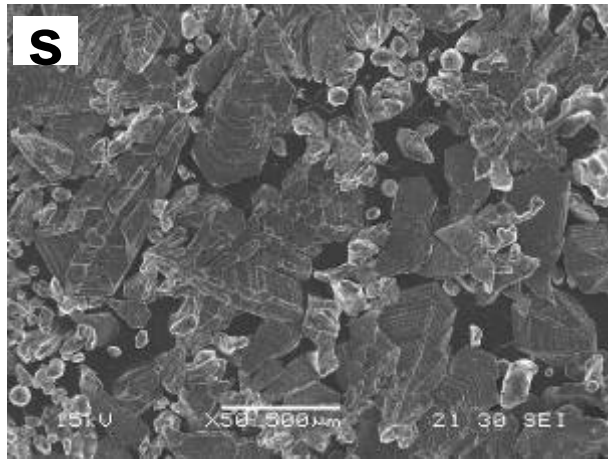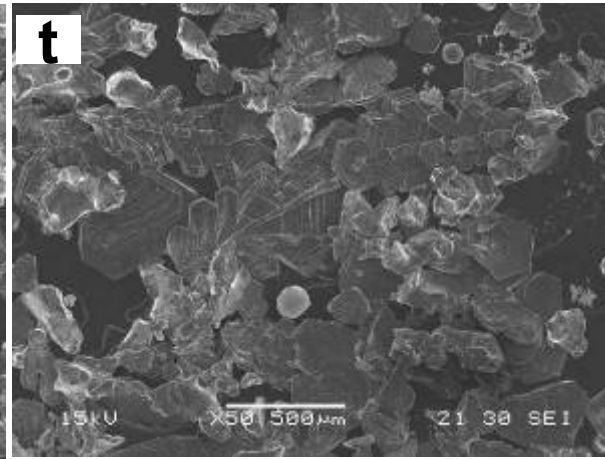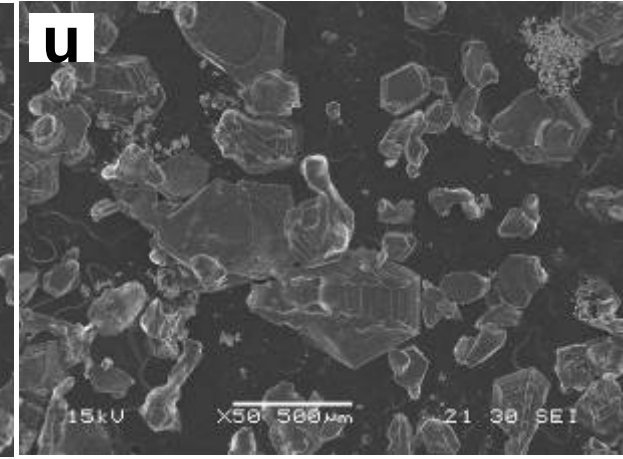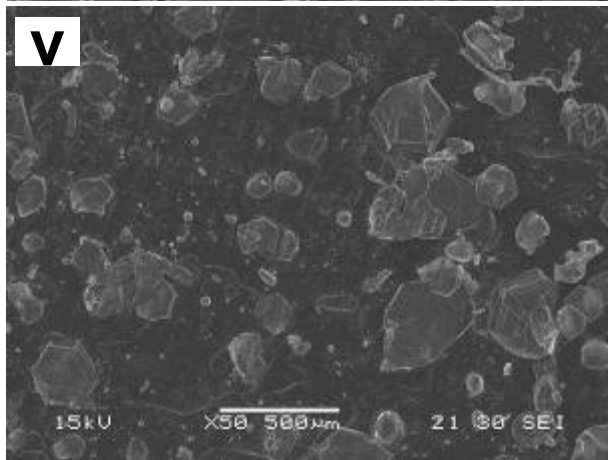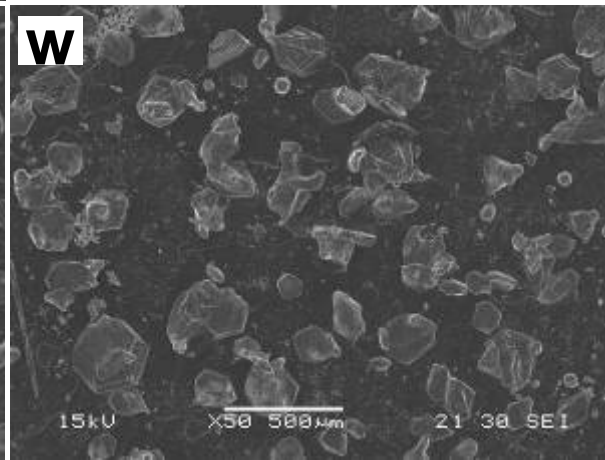

**Figure S3 – (1). 2 MPa product image**

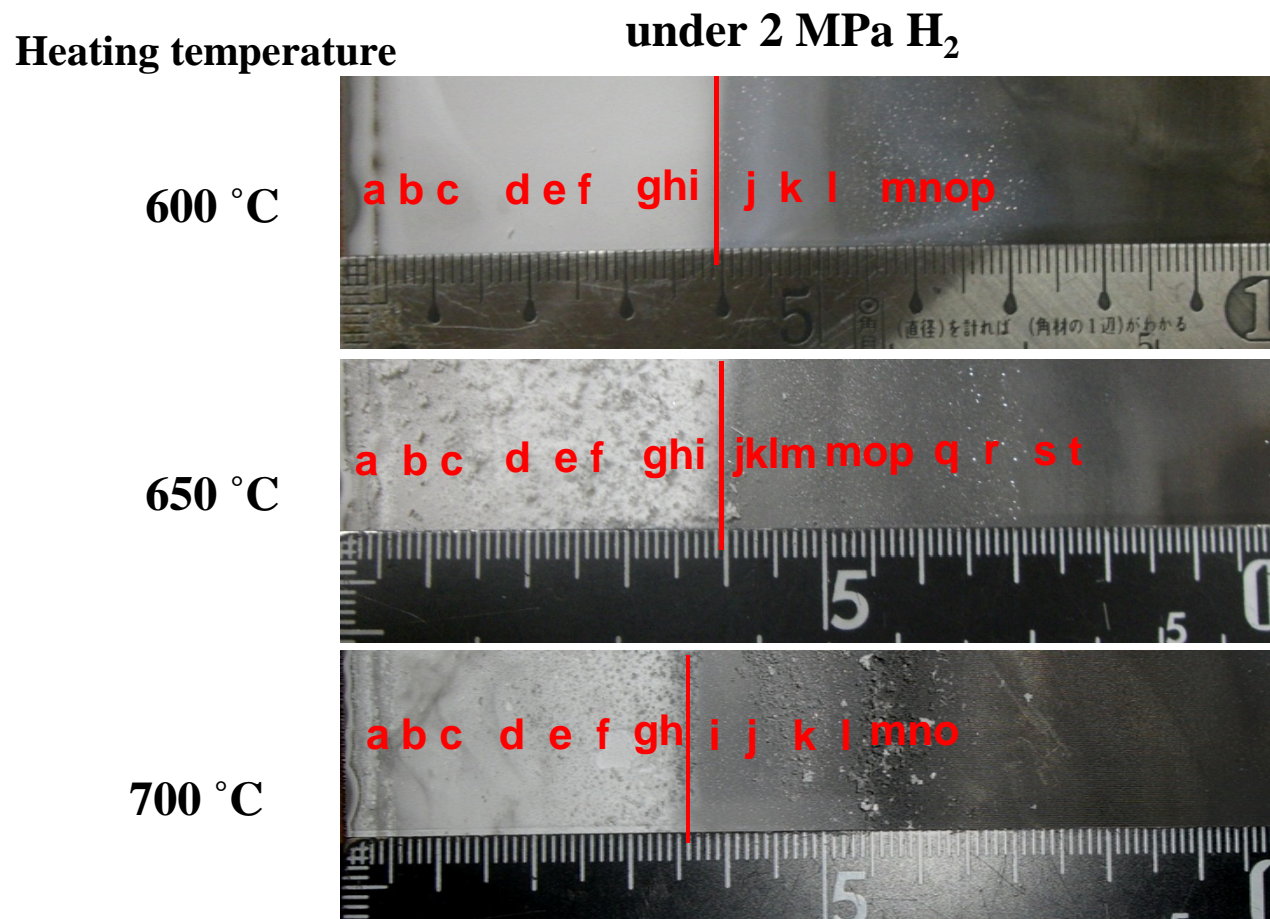

Figure S3 – (1). The images of the product obtained at 2 MPa H<sub>2</sub> with evaporation temperatures of 600, 650, and 700 °C. The abc... numbers are for SEM observation.

**Figure S3 – (2). 2 MPa temperature distribution**

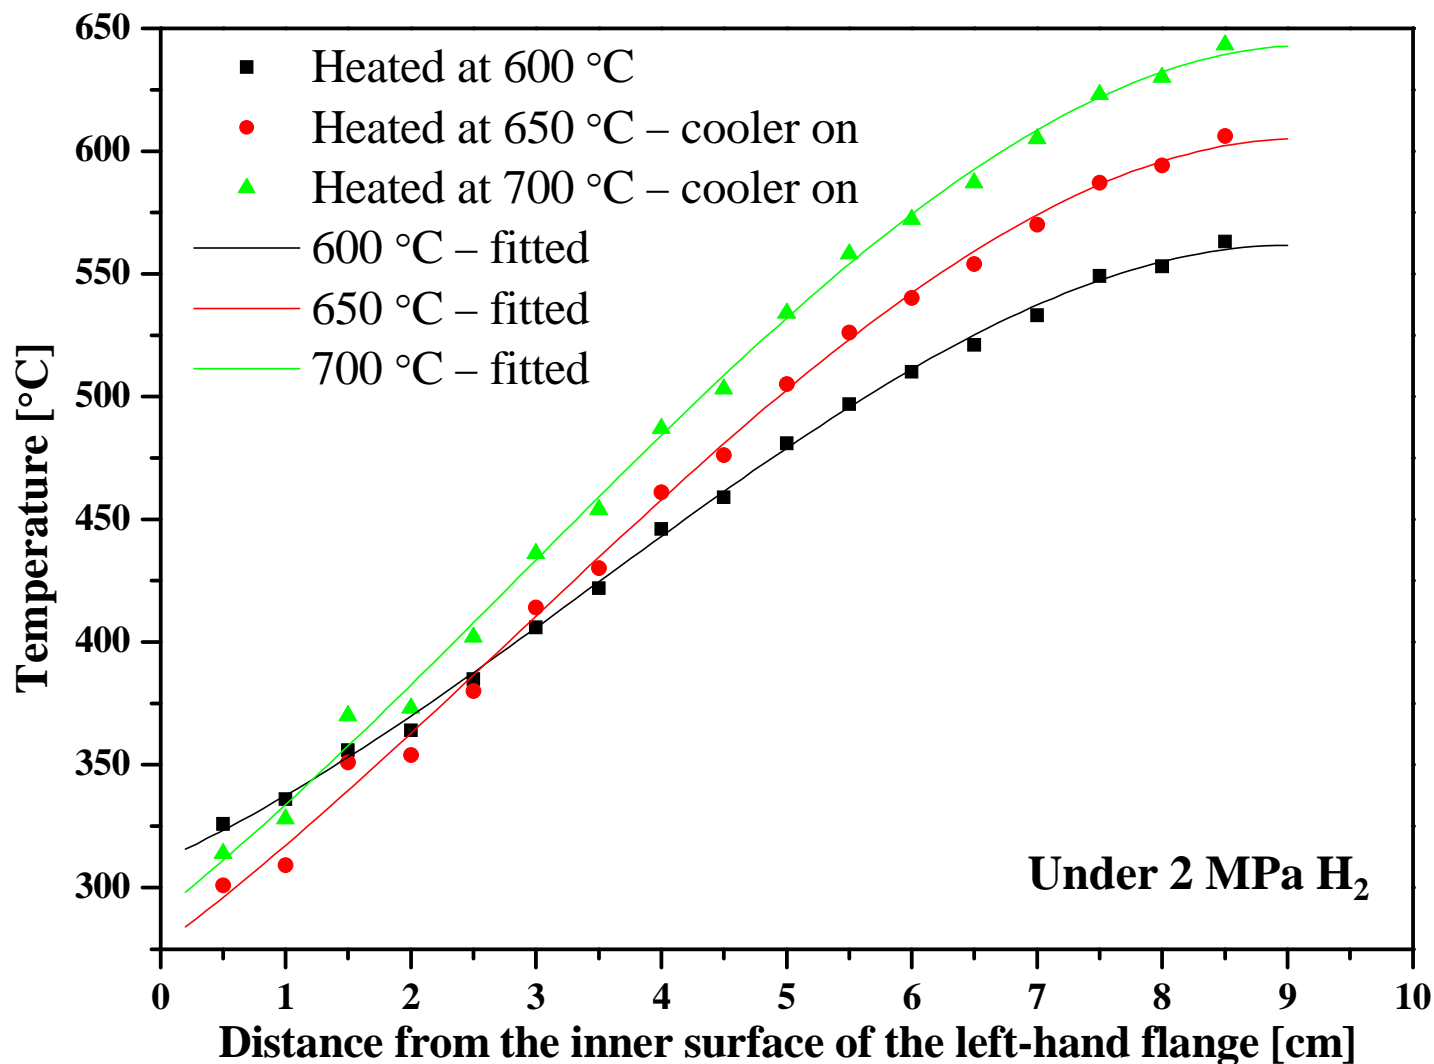

Figure S3 – (2). Temperature distribution on the mesh adhered along the tube wall under 2 MPa H<sub>2</sub> pressure at different evaporation temperatures. To make sure that the lowest deposition temperature is below 300 °C, a cooler jacket was set around the flange with the evaporation temperature of 650 and 700 °C.

**Figure S3 – (3). 2 MPa SEM images**

2 MPa – 600 °C

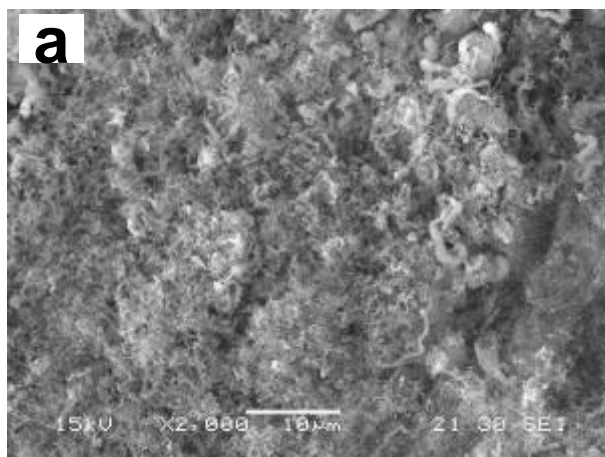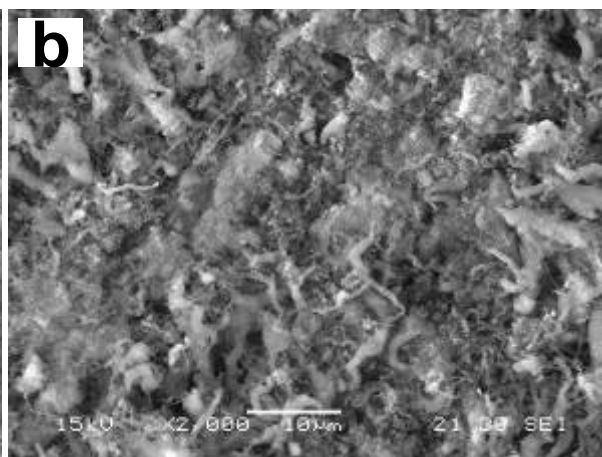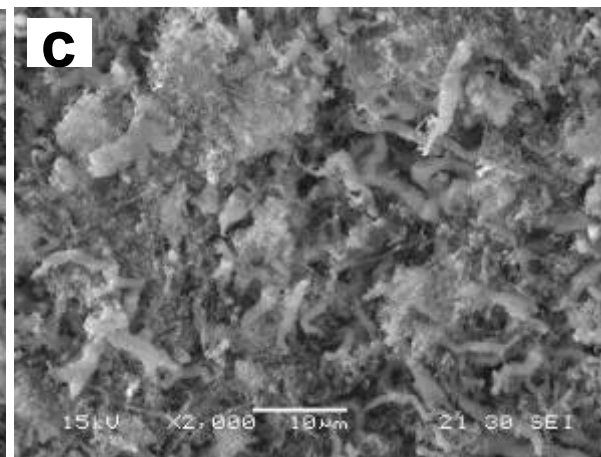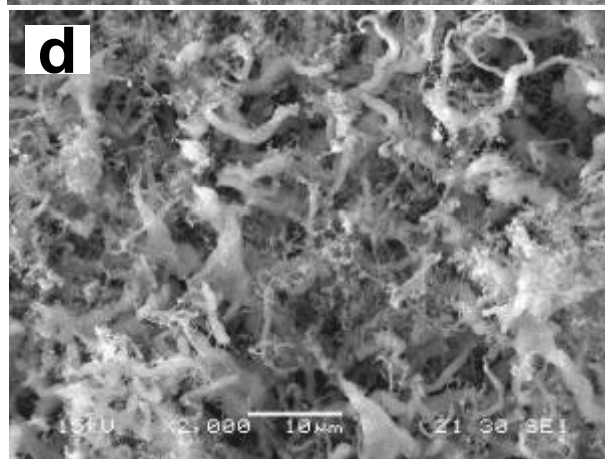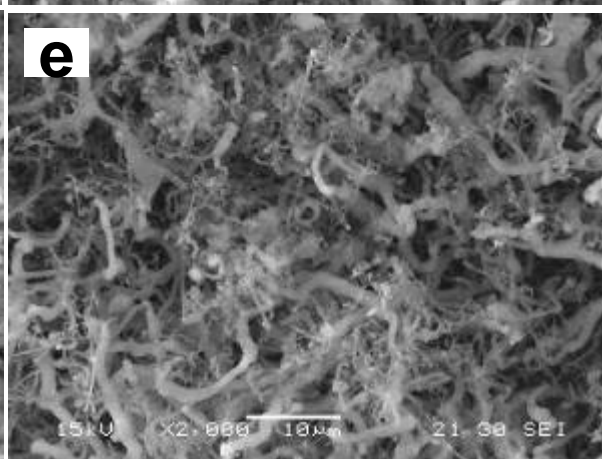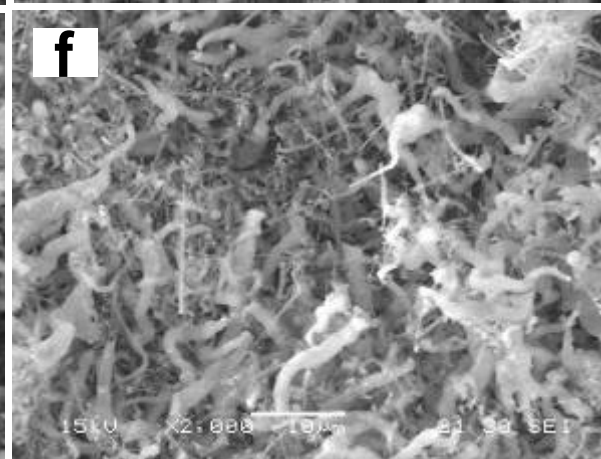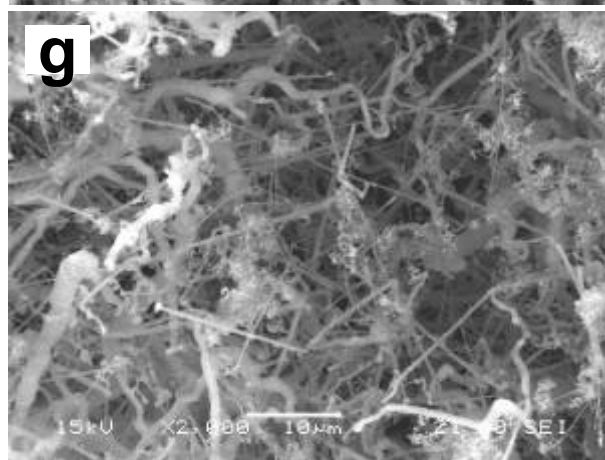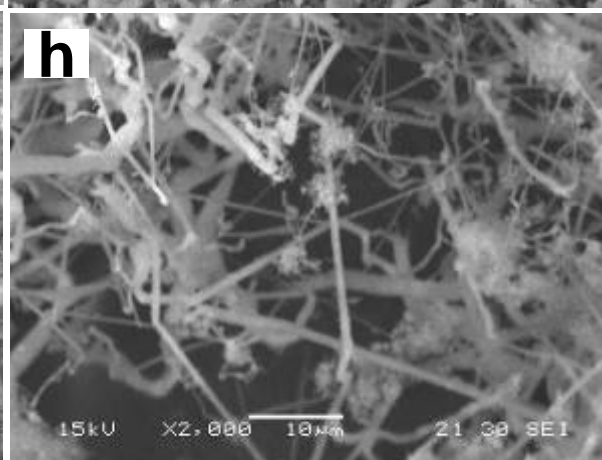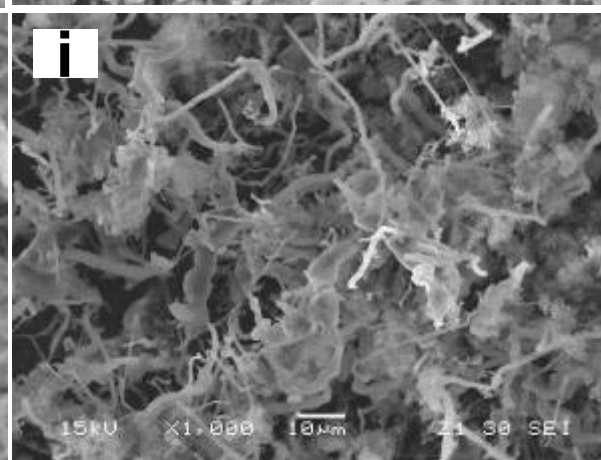

2 MPa – 600 °C

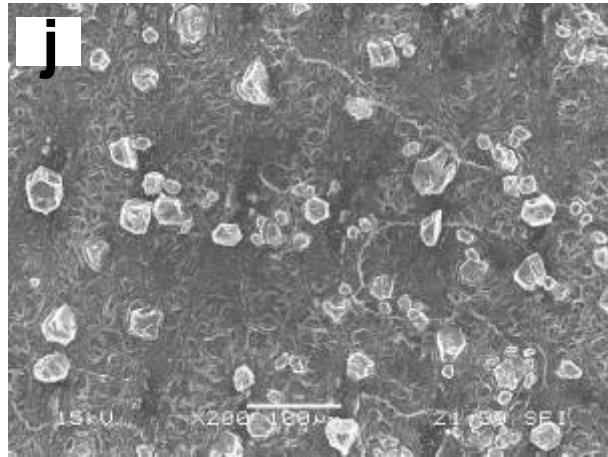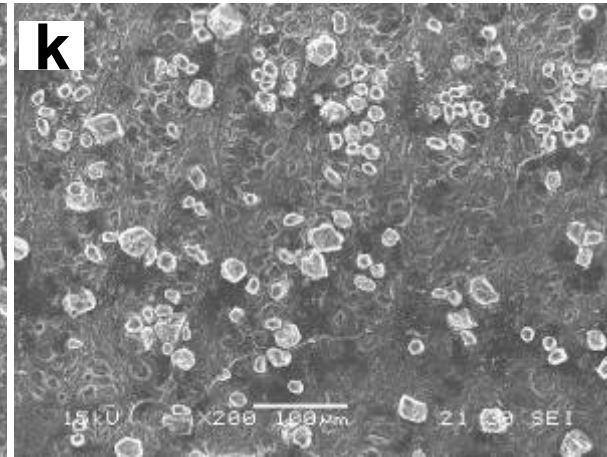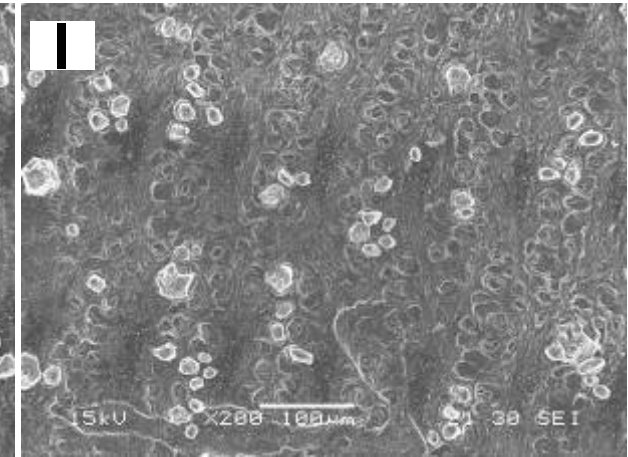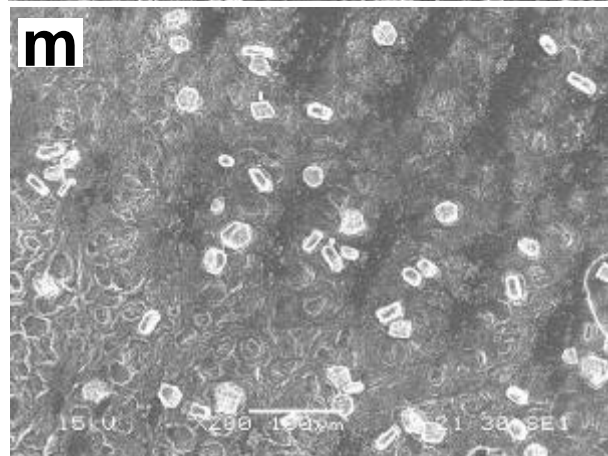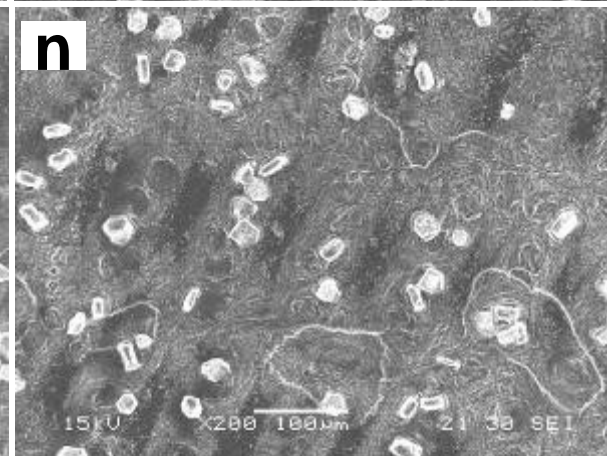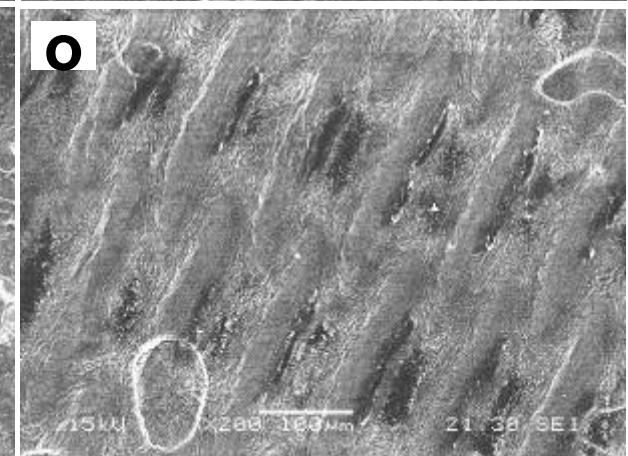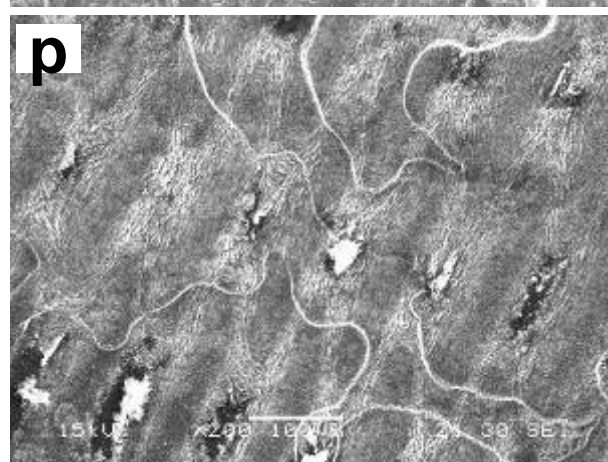

2 MPa – 650 °C

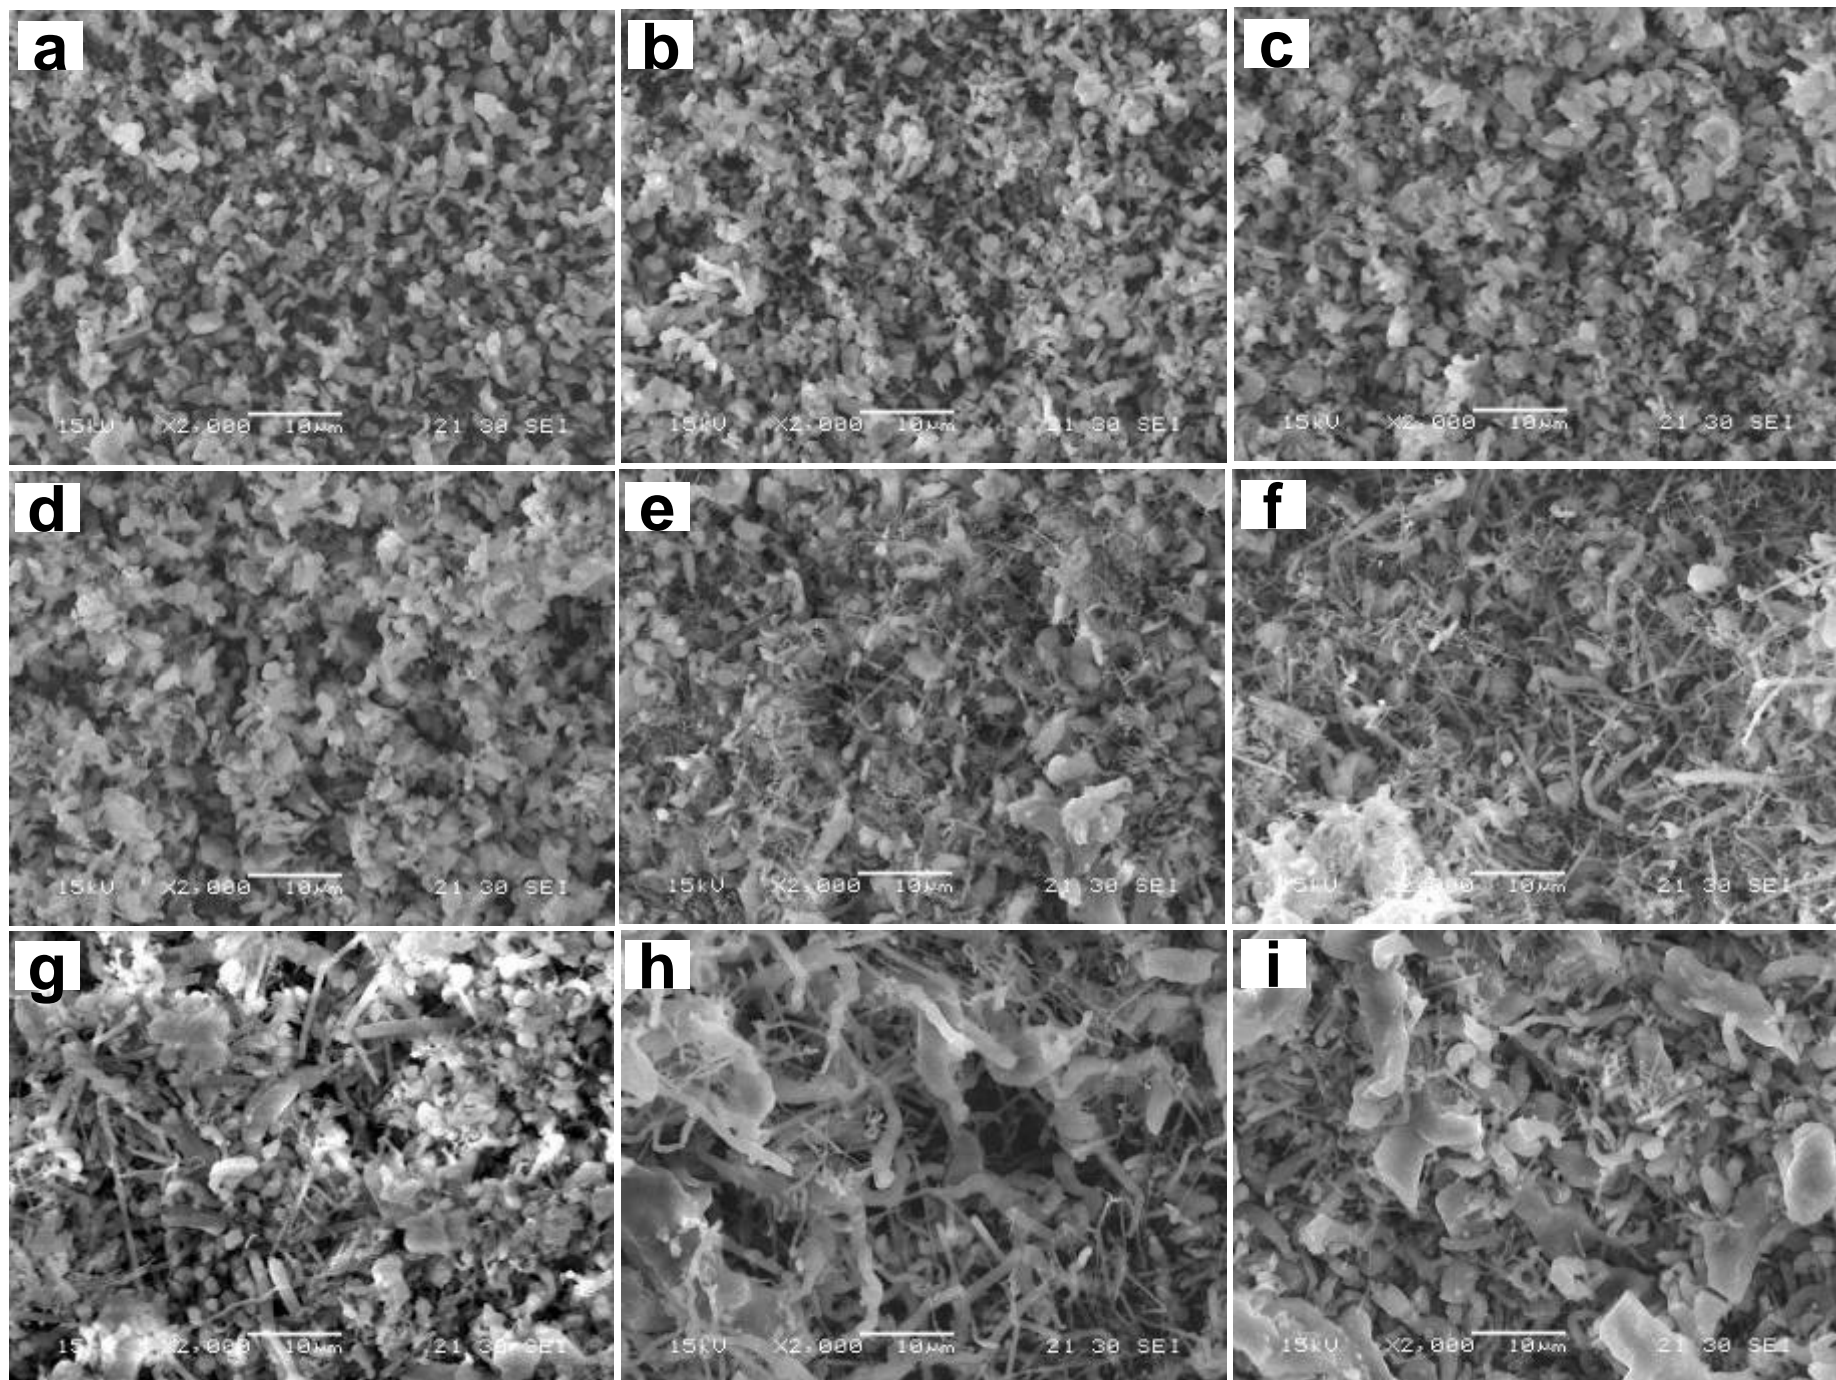

2 MPa – 650 °C

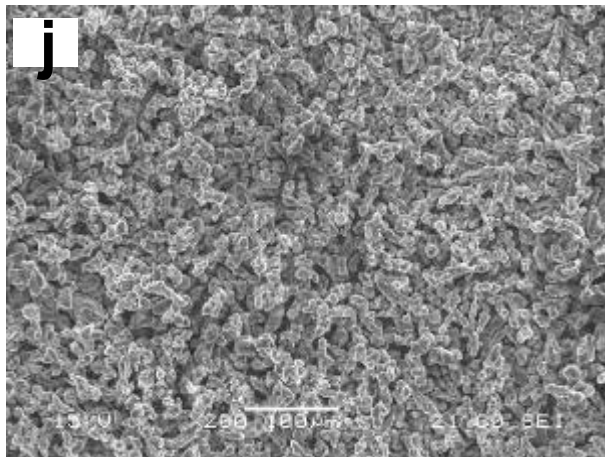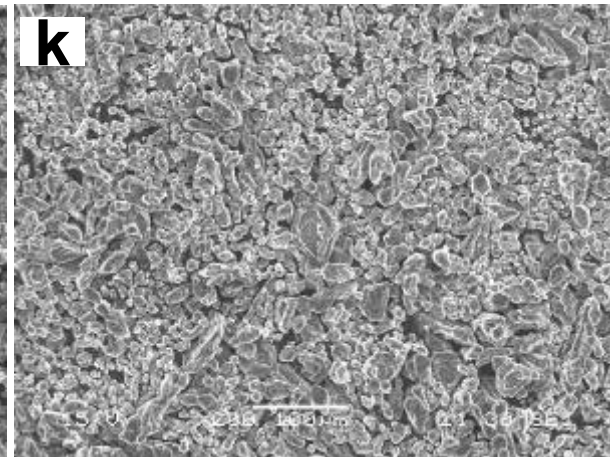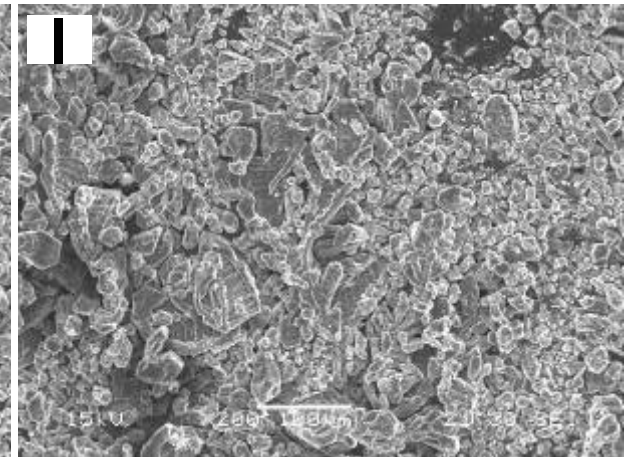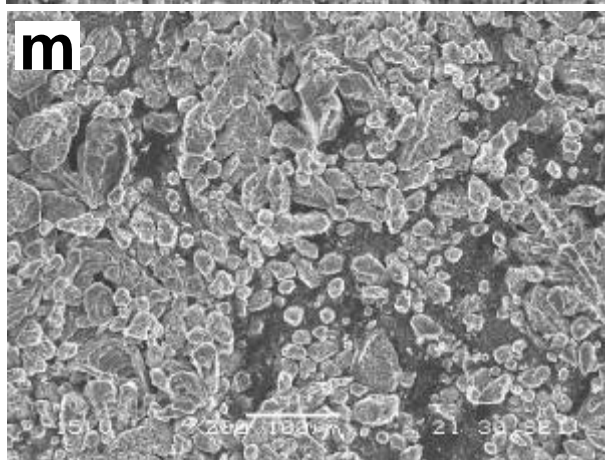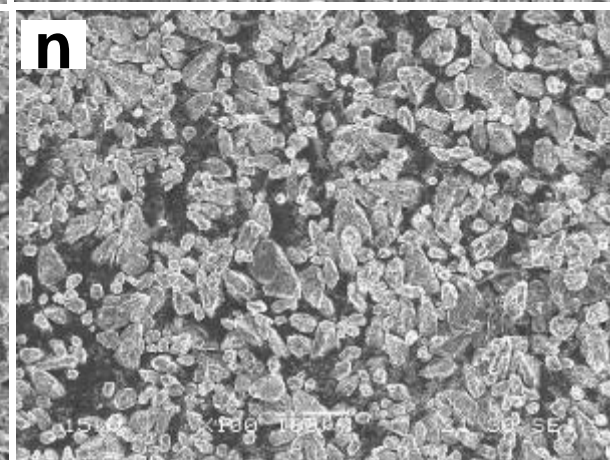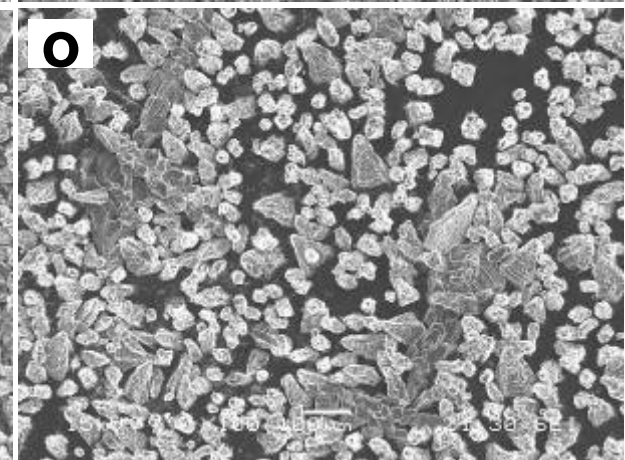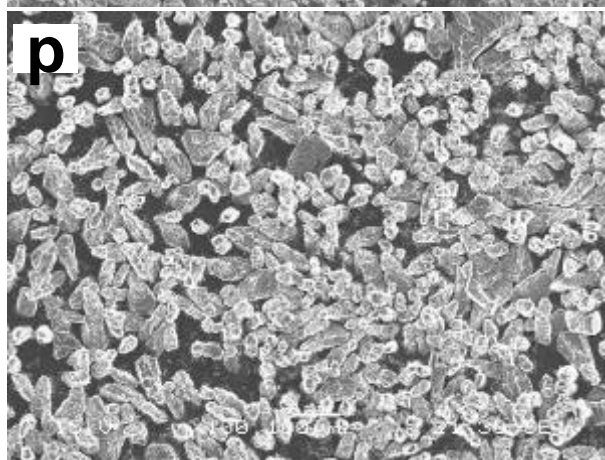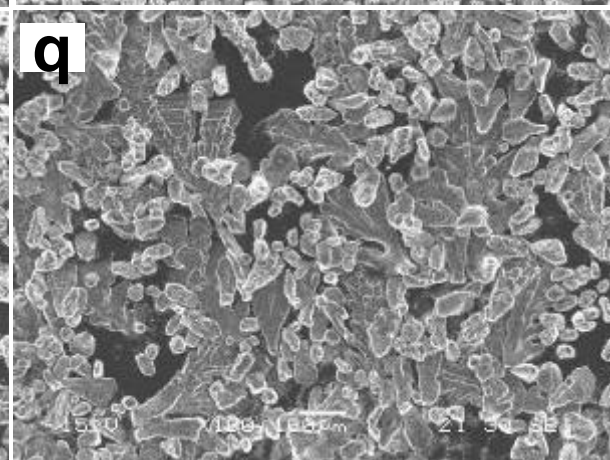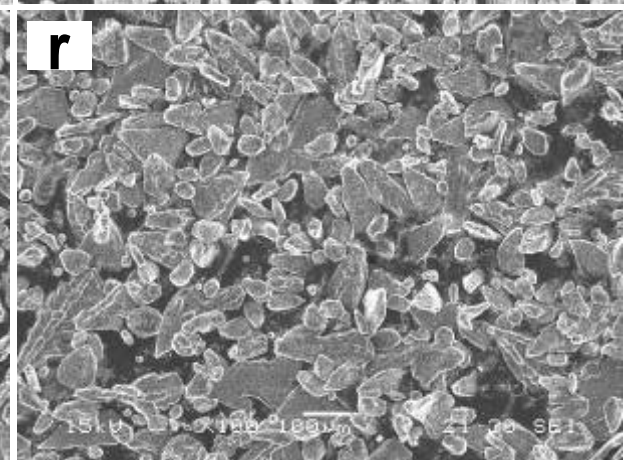

2 MPa – 650 °C

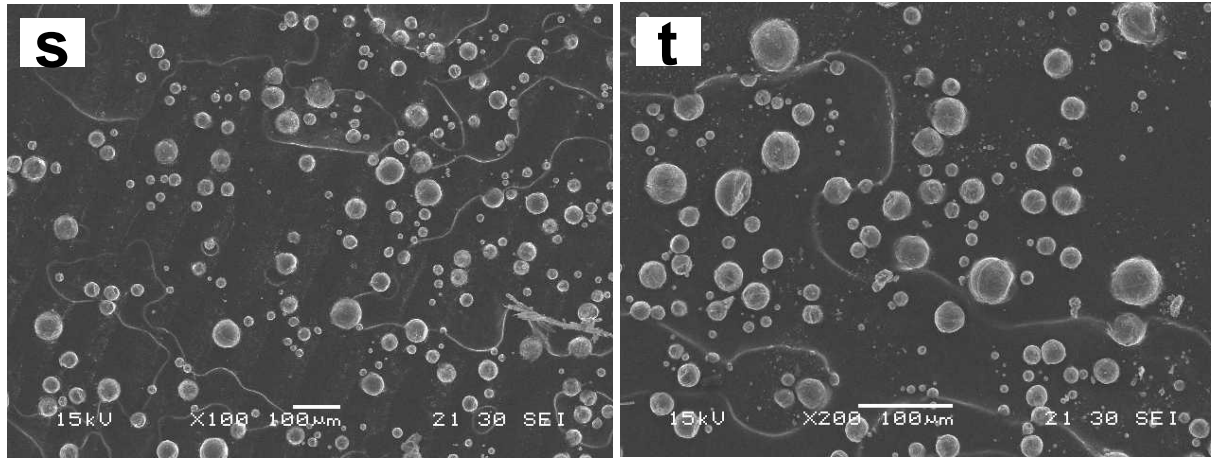

The spherical shapes can be found at a certain growth condition (heating time and evaporation temperature) at the high temperature side; with the growth time, these spheres will disappear to form hexagonal shapes or dendritic shapes.

2 MPa – 700 °C

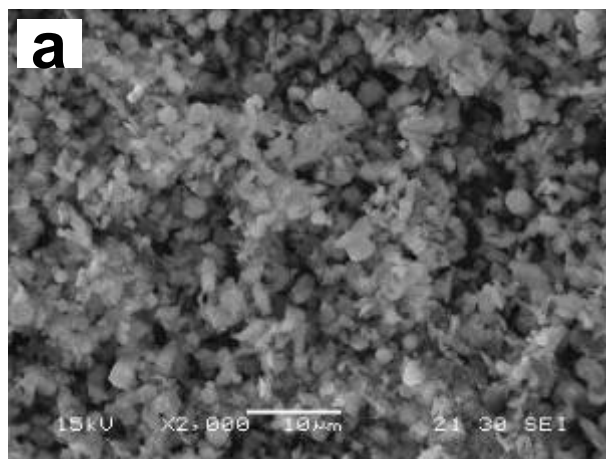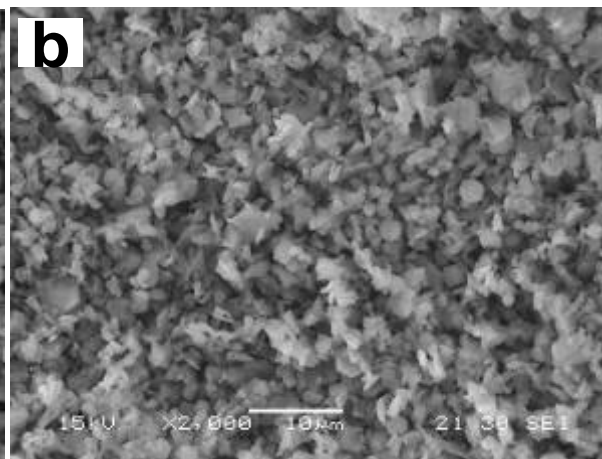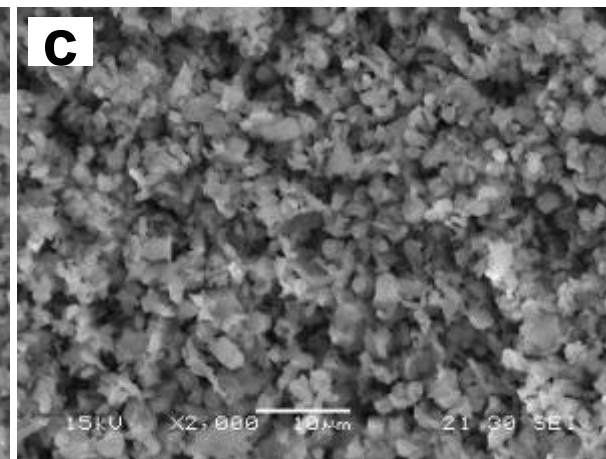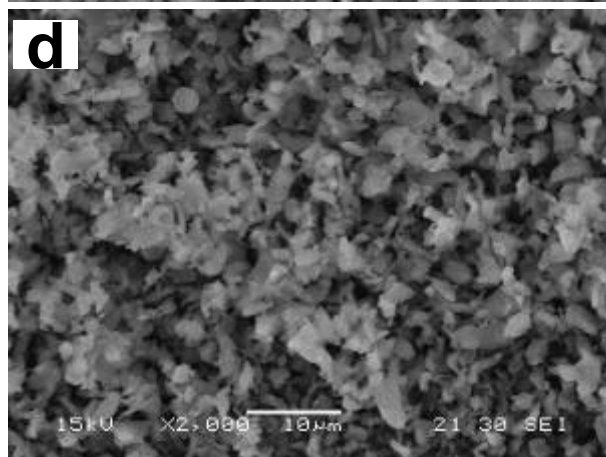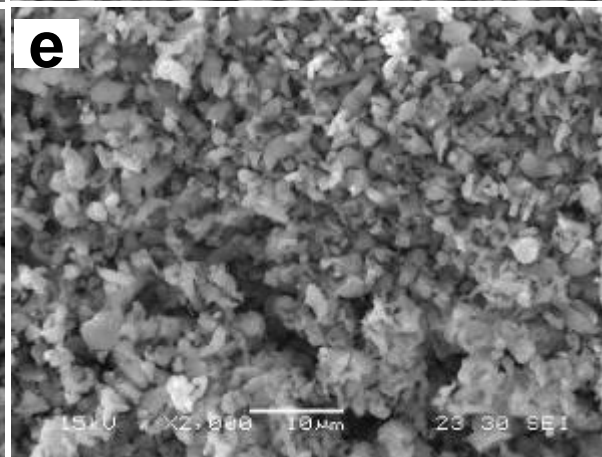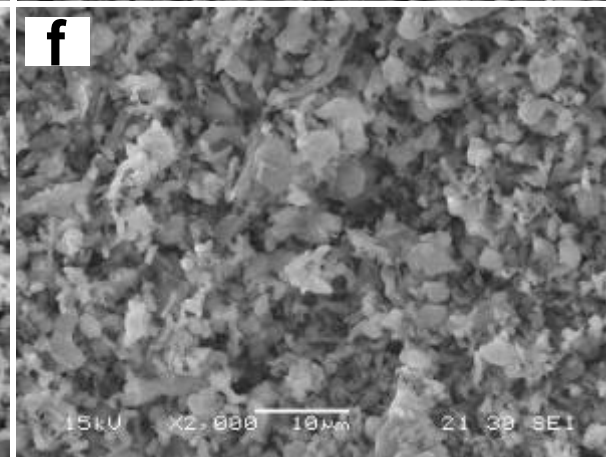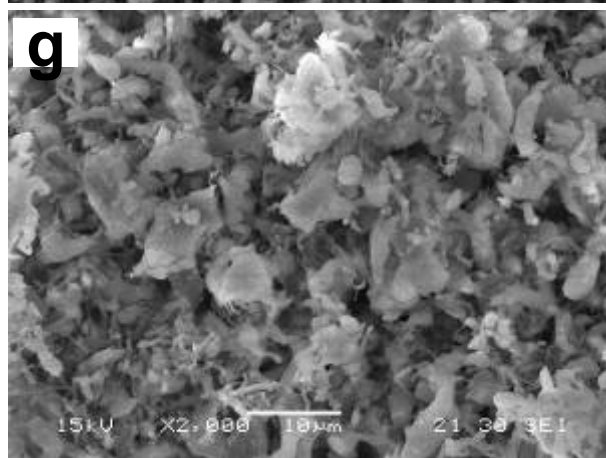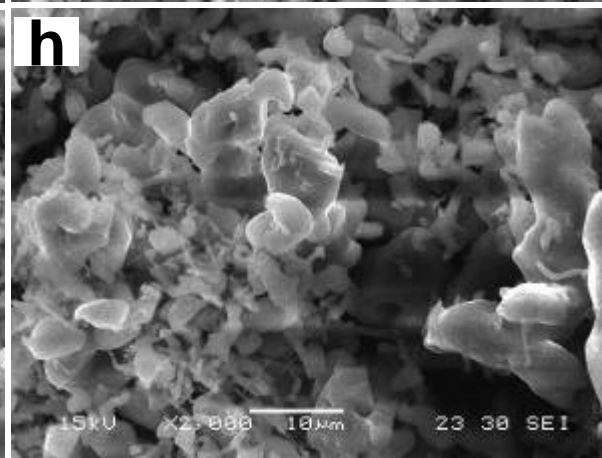

2 MPa – 700 °C

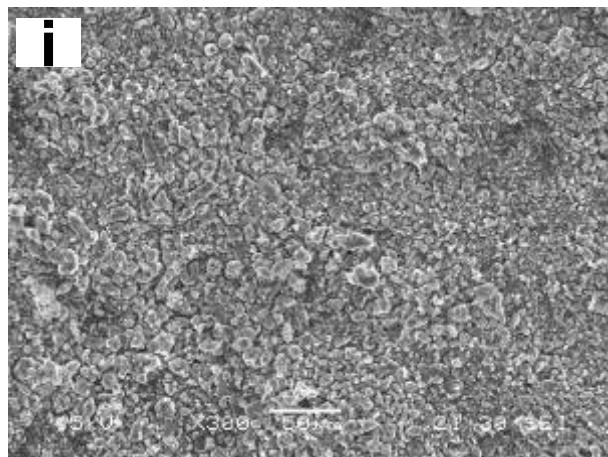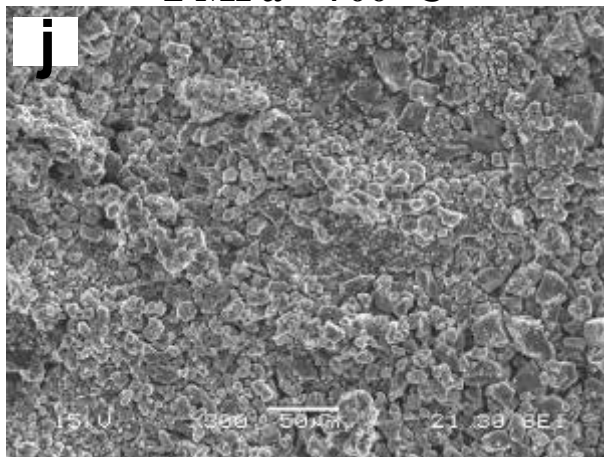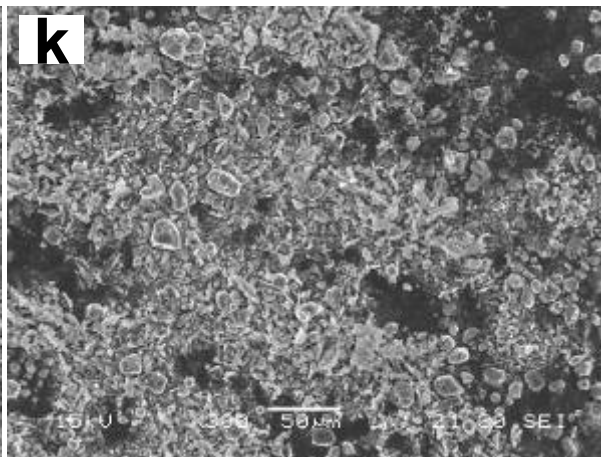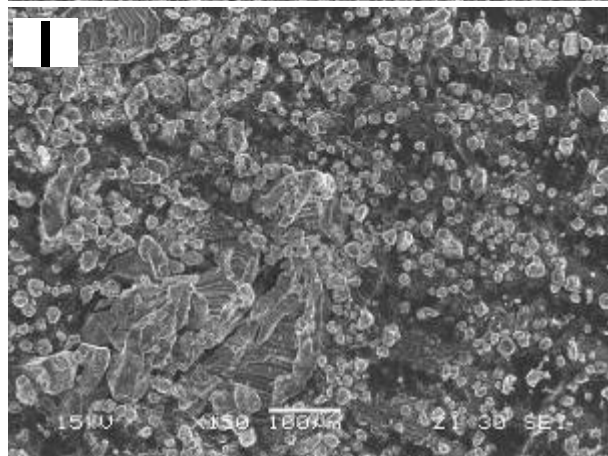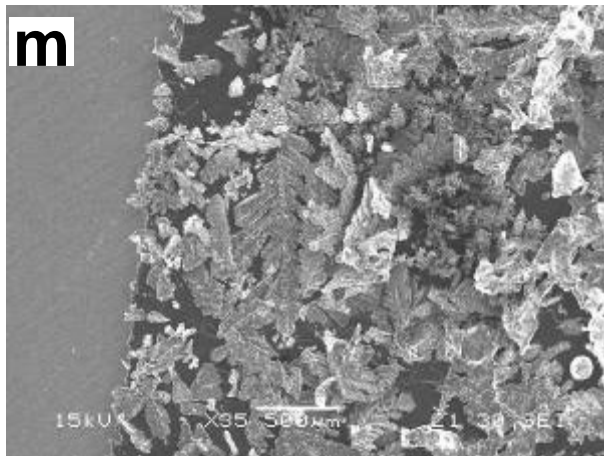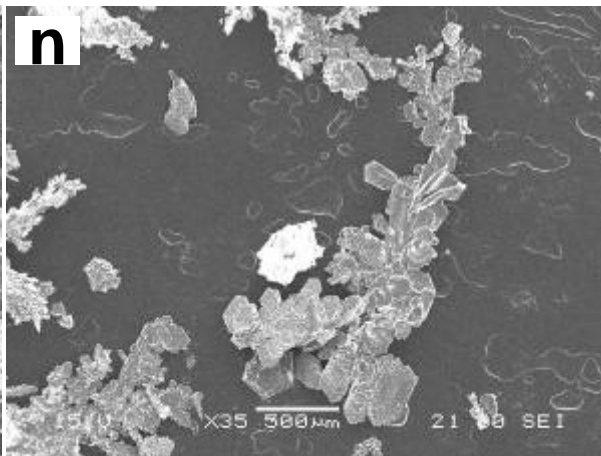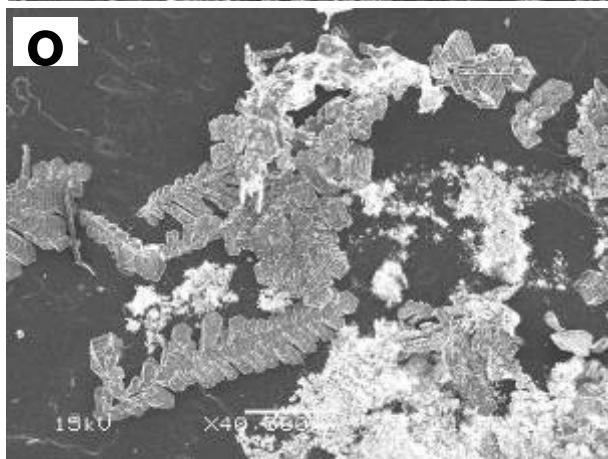

Figure S4. The calculated condensation rate for Mg gas as a function of deposition temperature under 1 and 2 MPa H<sub>2</sub> with evaporation temperatures of 600, 650, and 700 °C (the solid lines), respectively. The as-proposed hydrogenation rate for the solidified Mg as a function of deposition temperature under 1 and 2 MPa H<sub>2</sub> is plotted in the dash-dot lines; the hydrogenation rate curves were plotted based on the results of sample distribution obtained with a heating time of 4 hours.

From this figure, we can confirm that: (1) above the dissociation temperature at a certain H<sub>2</sub> pressure, only Mg deposits are obtained; (2) below the dissociation temperature, when  $R_2 > R_1$  high-purity MgH<sub>2</sub> is produced, and when  $R_1 > R_2$  a mixture of MgH<sub>2</sub> and Mg is obtained; (3) a high H<sub>2</sub> pressure offers a larger high-purity MgH<sub>2</sub> production area; and (4) the composition of the products under other growth conditions can be predicted using this figure.

1 MPa

Figure S4

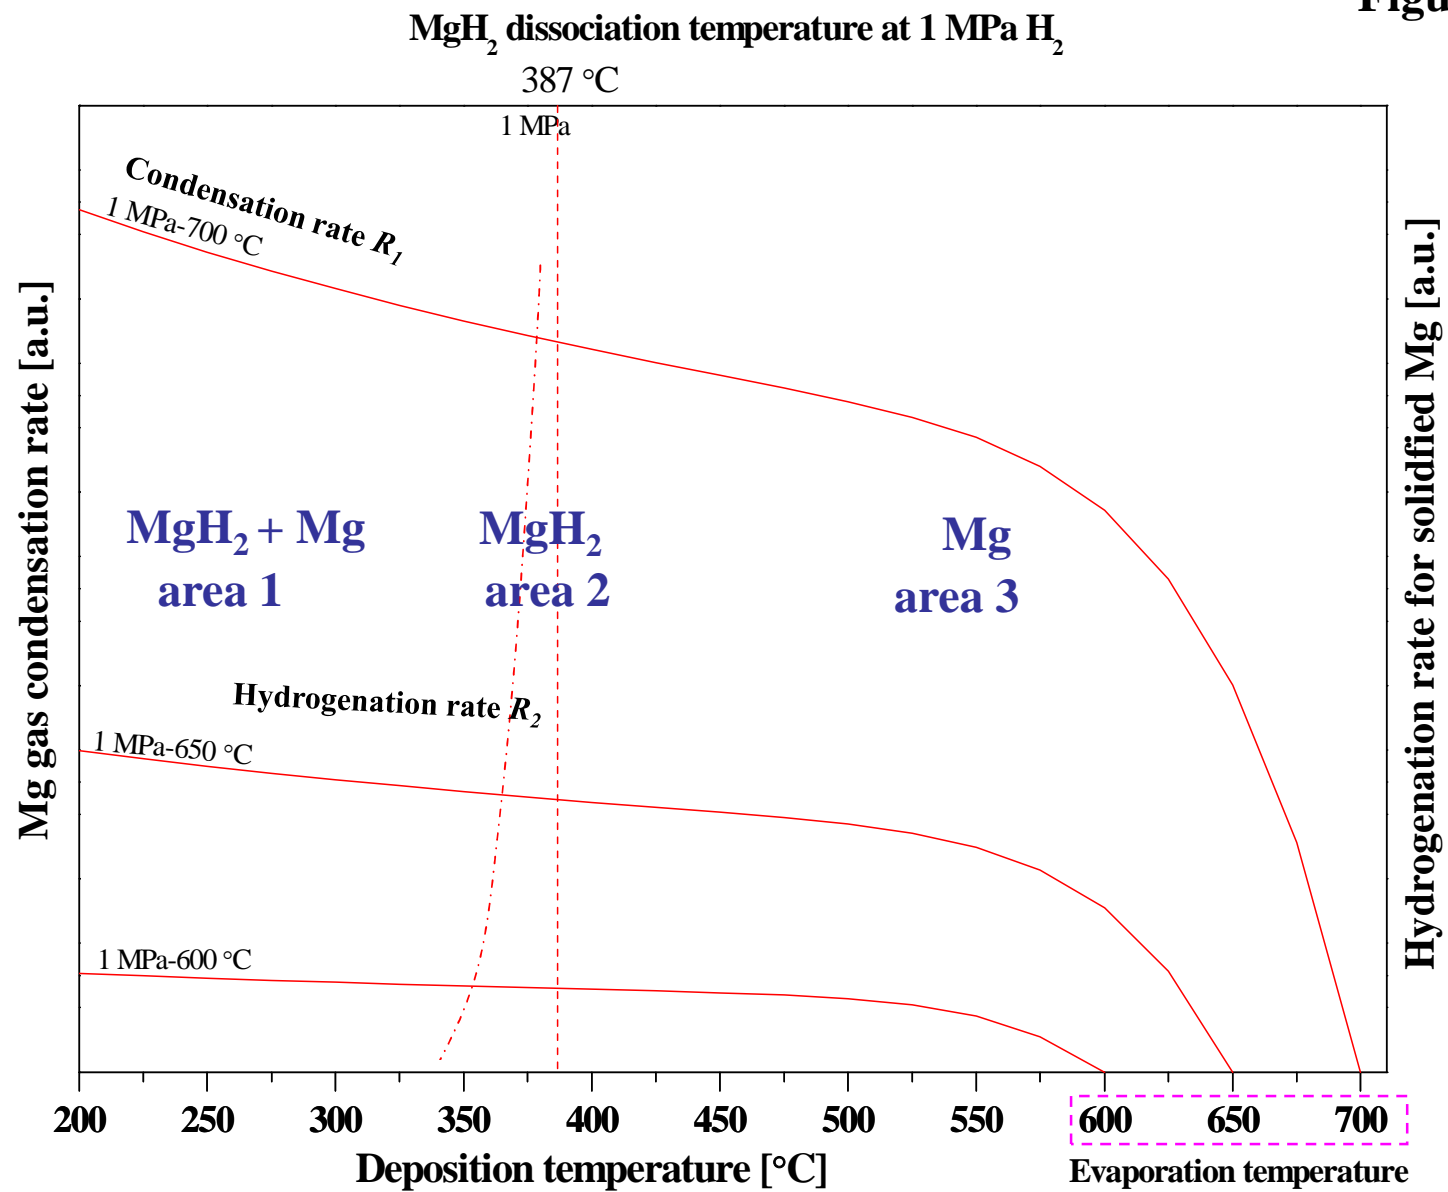

2 MPa

Figure S4

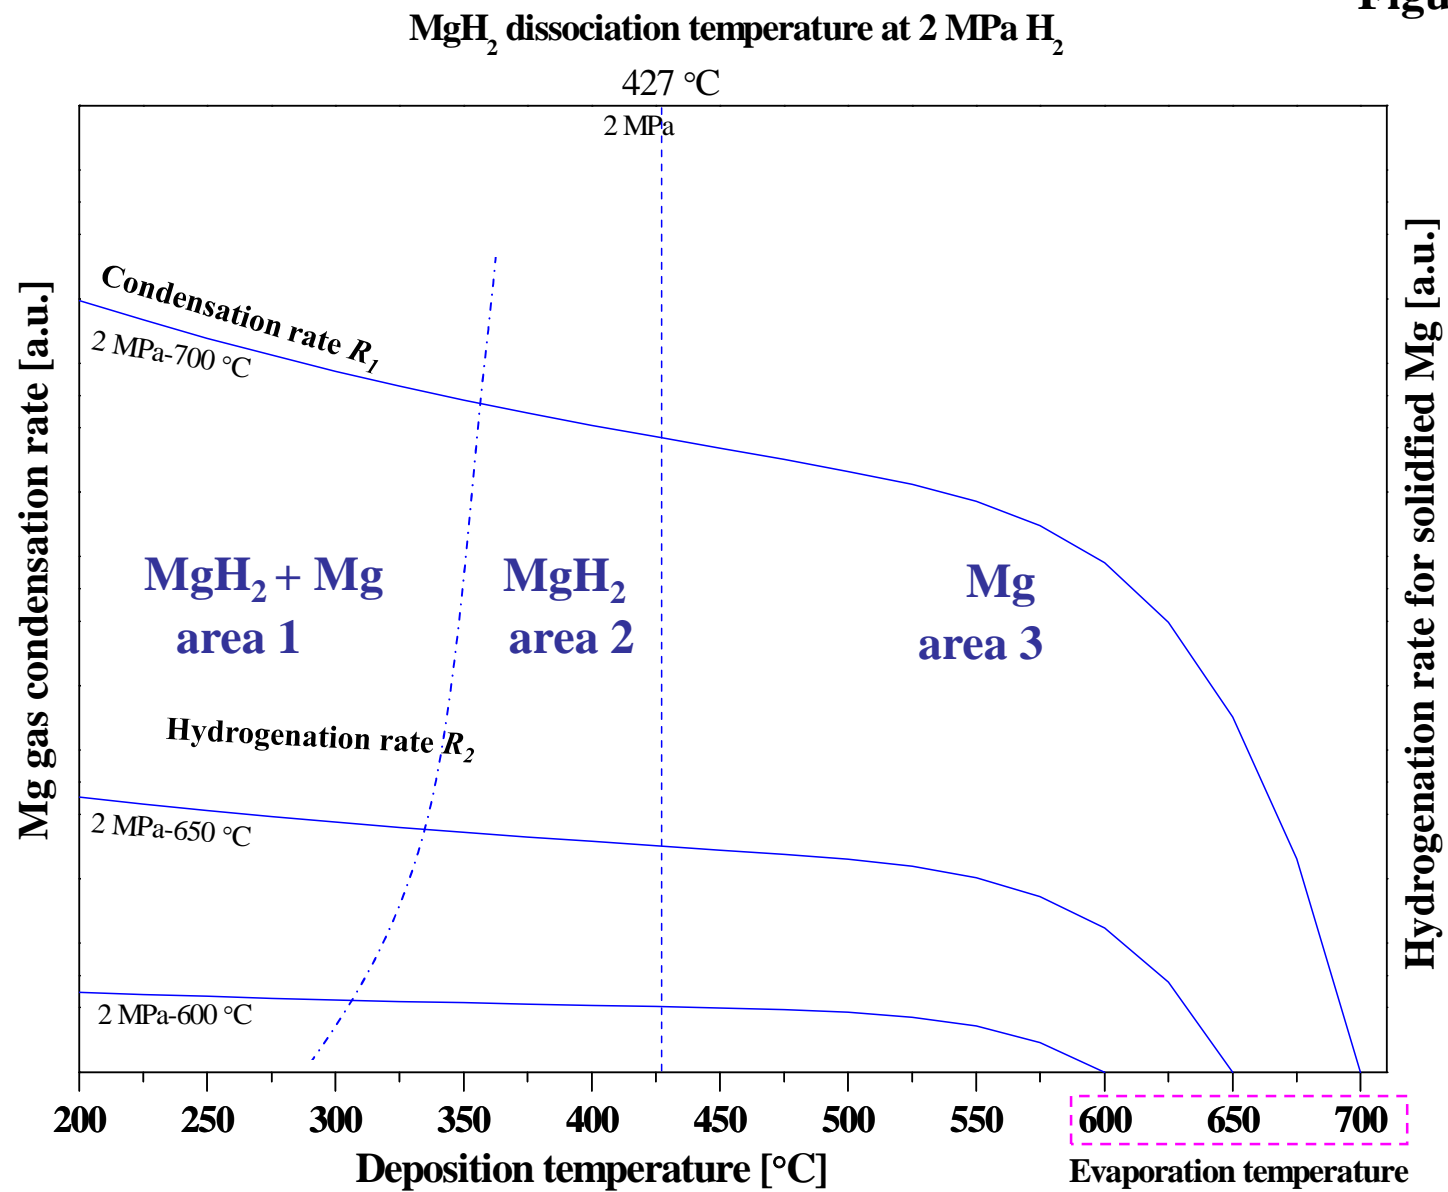

A combined one

Figure S4

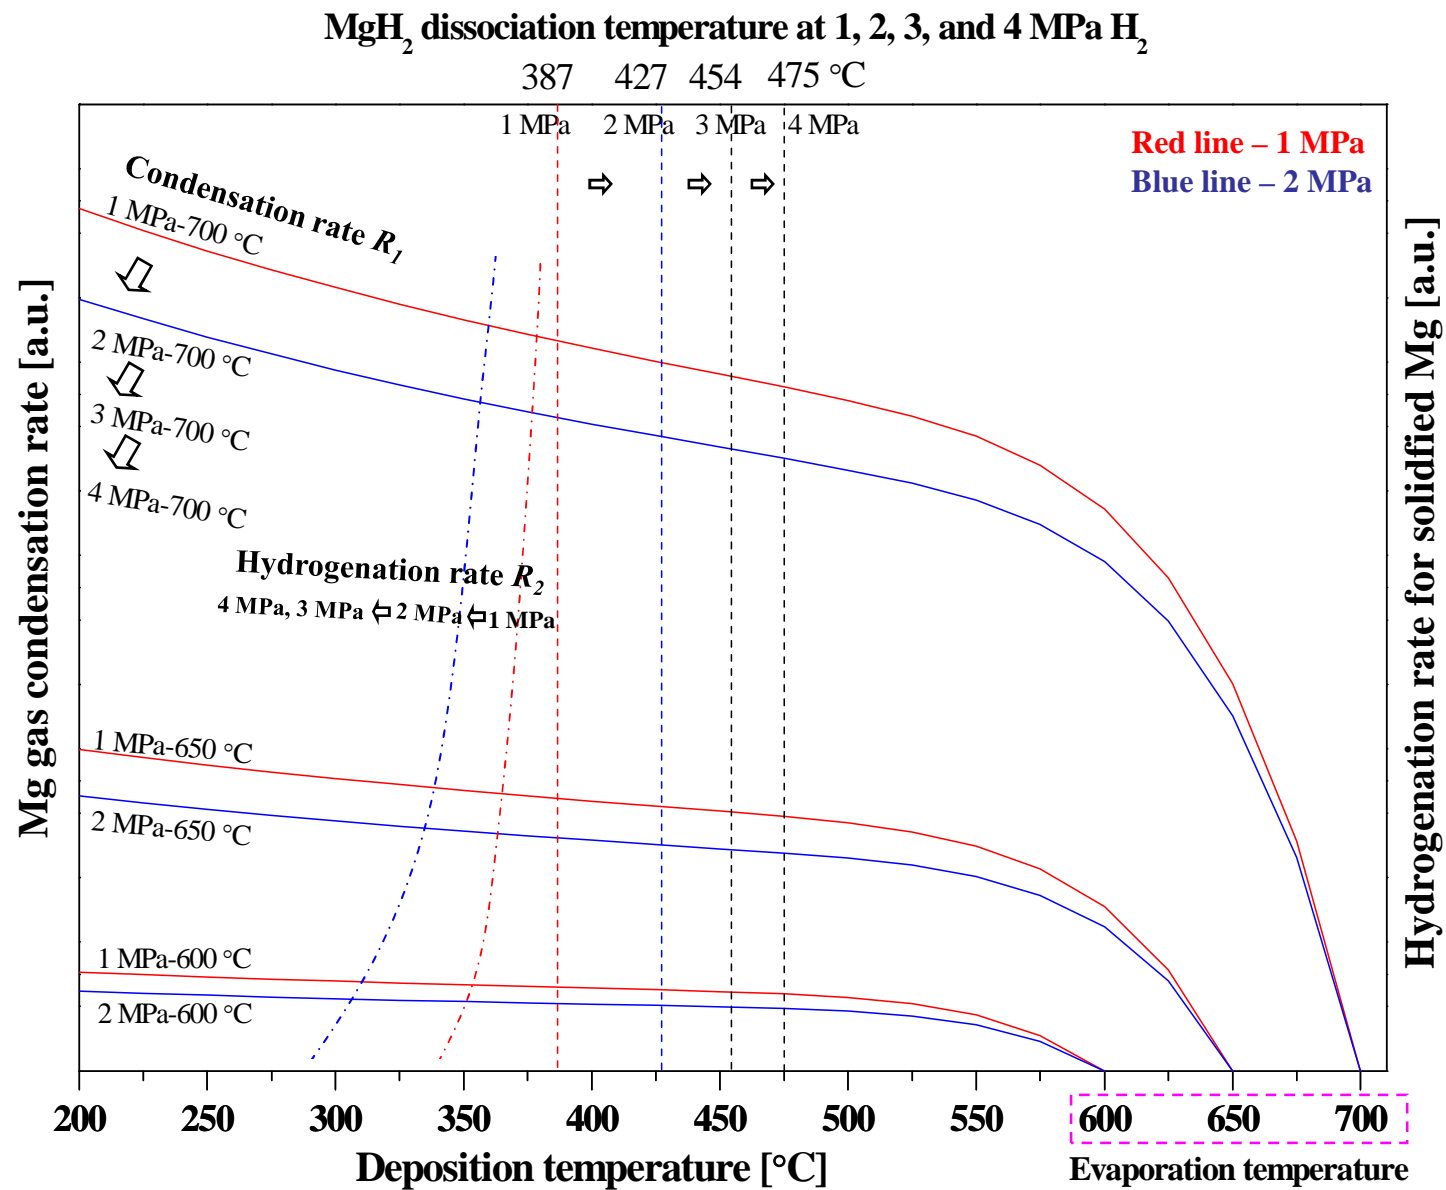

Supplement: Supplementary file 1 [file 4266439]
